# Supplementary material
Source: ML conference proceedings conference paper supplement (https://openreview.net/forum?id=IAXBLI2vo5)

Layer 1

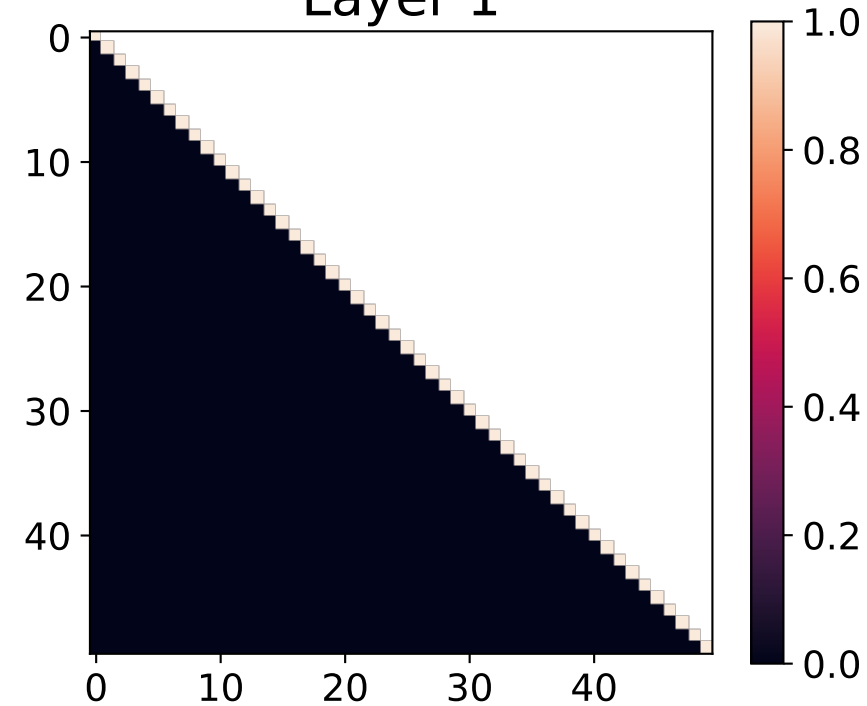

Layer 2

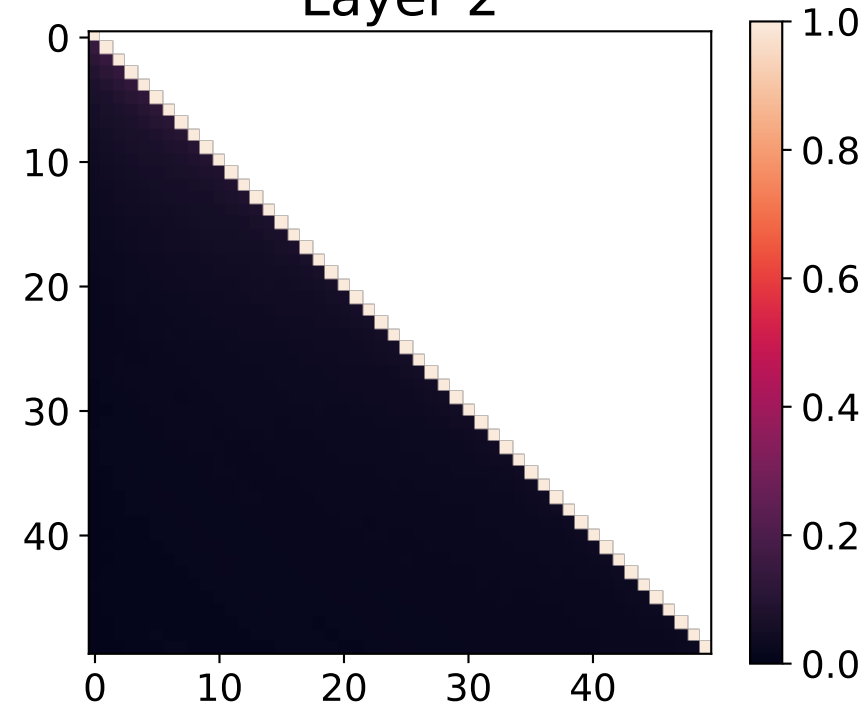

Layer 3

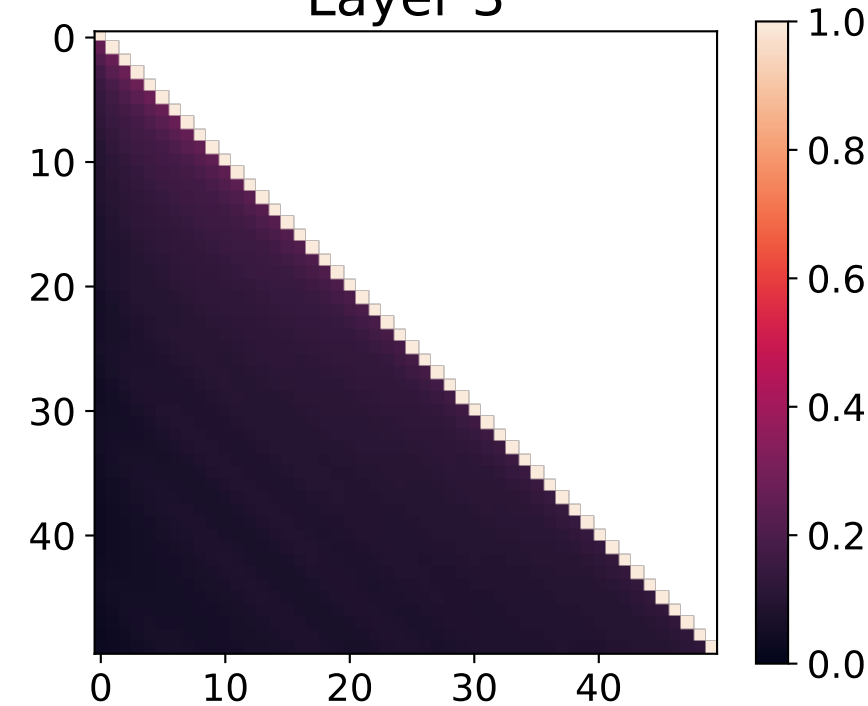

Layer 4

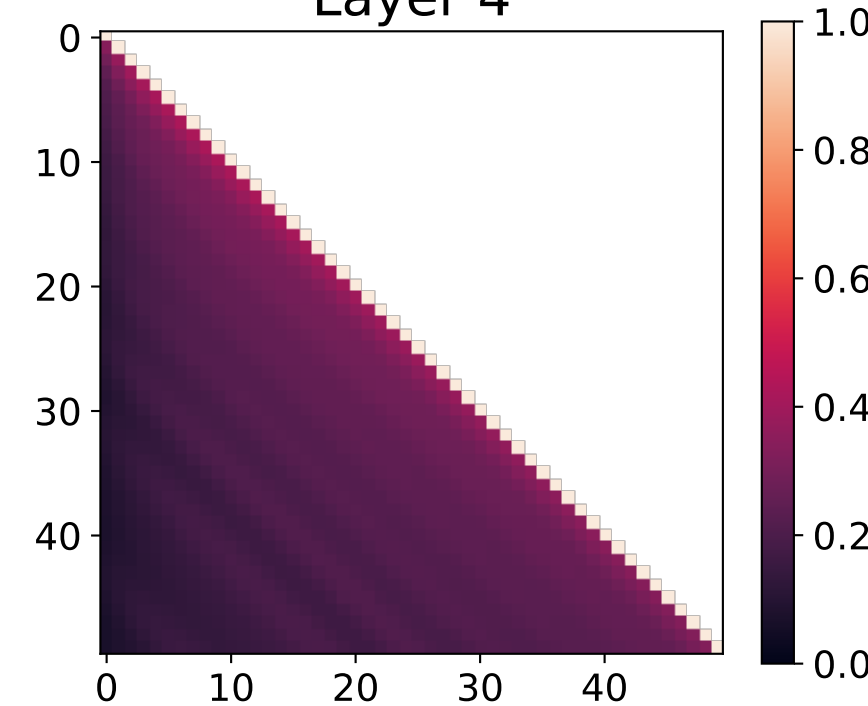

Layer 1 (Normalized)

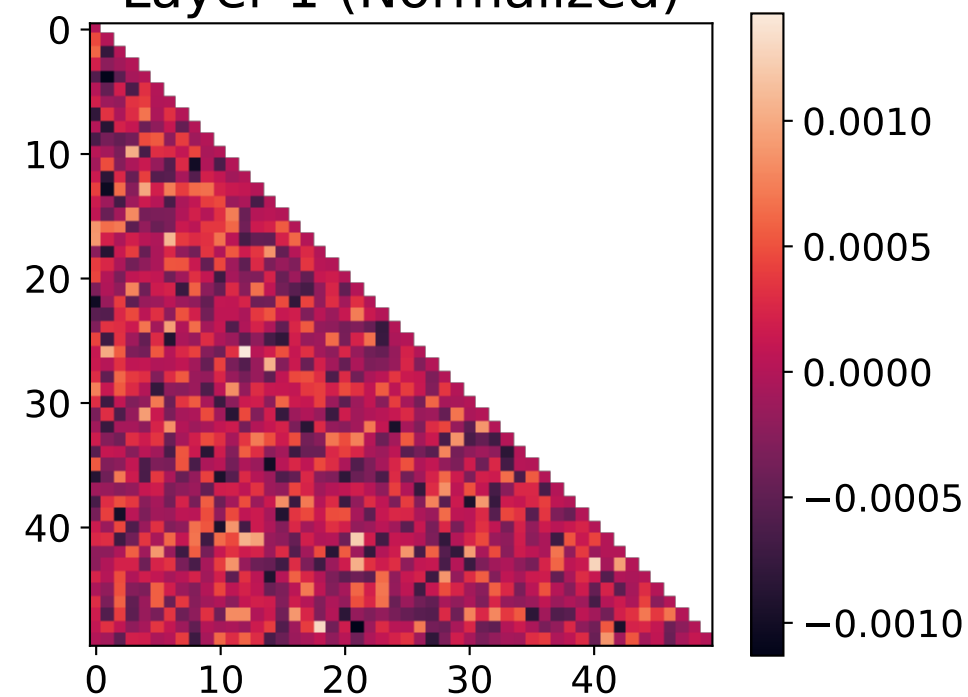

Layer 2 (Normalized)

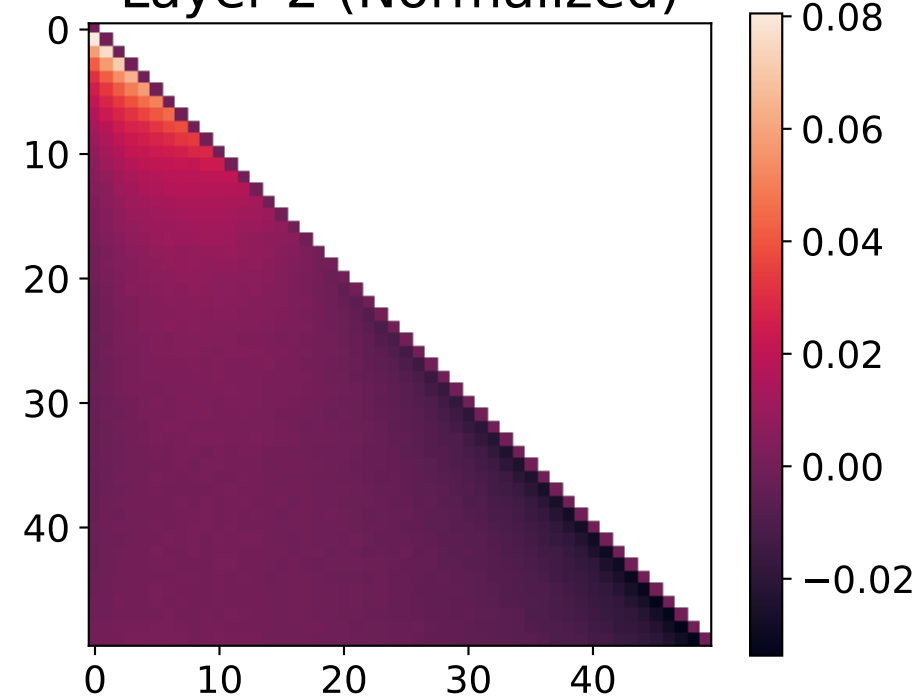

Layer 3 (Normalized)

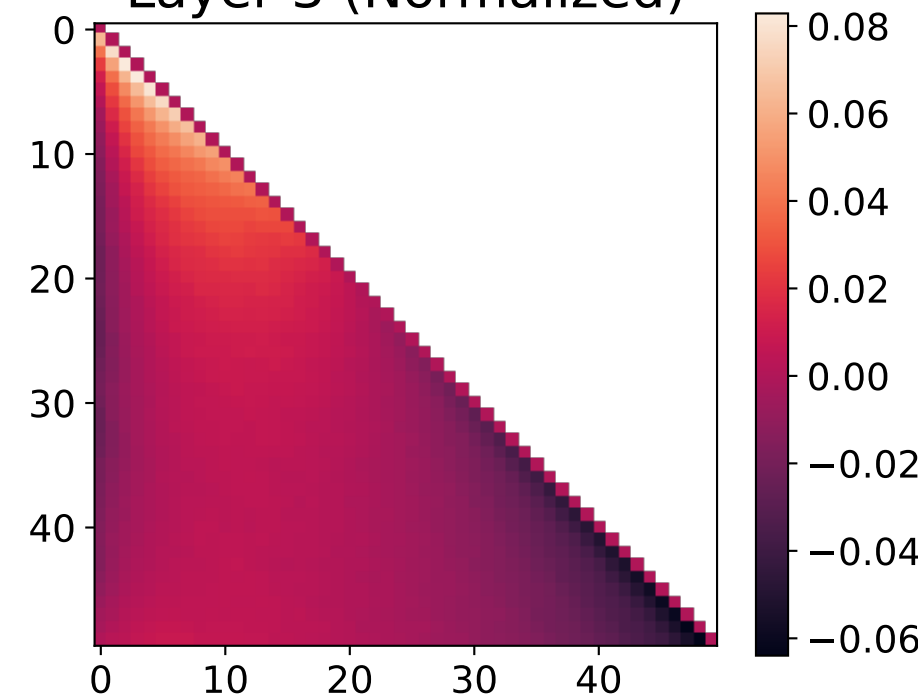

Layer 4 (Normalized)

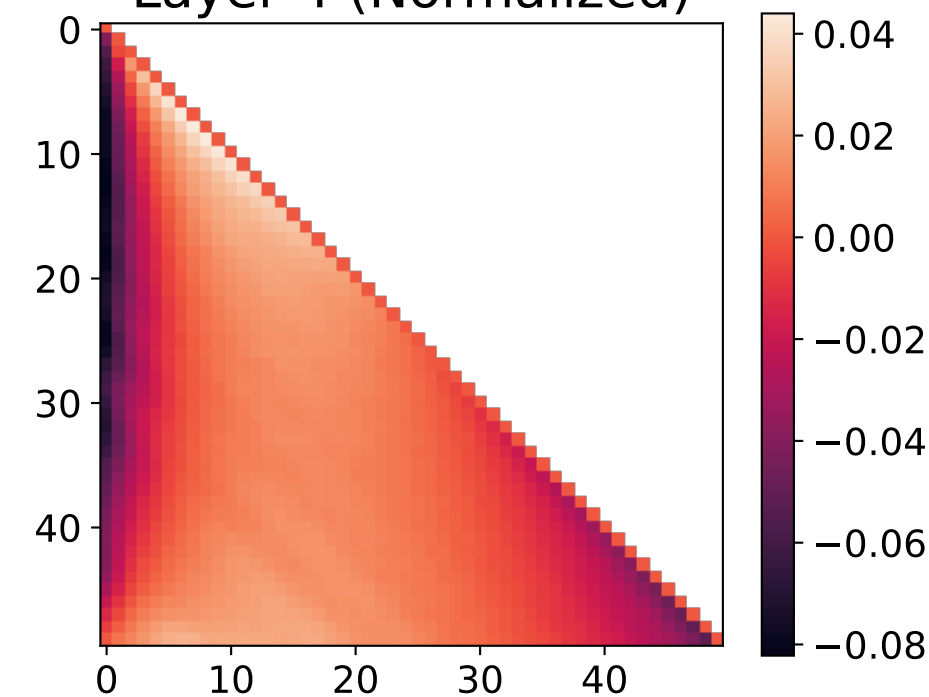

Supplement: supplementary_material [file rope_causal_0.pdf › figures/rope_causal_0.pdf]
