# Supplementary material
Source: ML conference proceedings conference paper supplement (https://openreview.net/forum?id=IAXBLI2vo5)

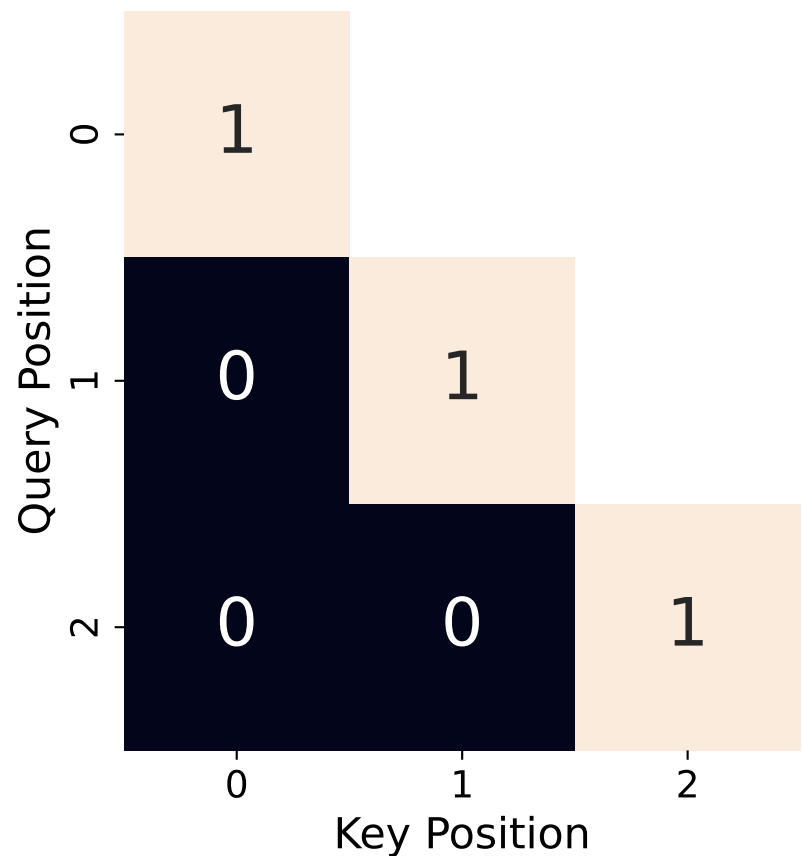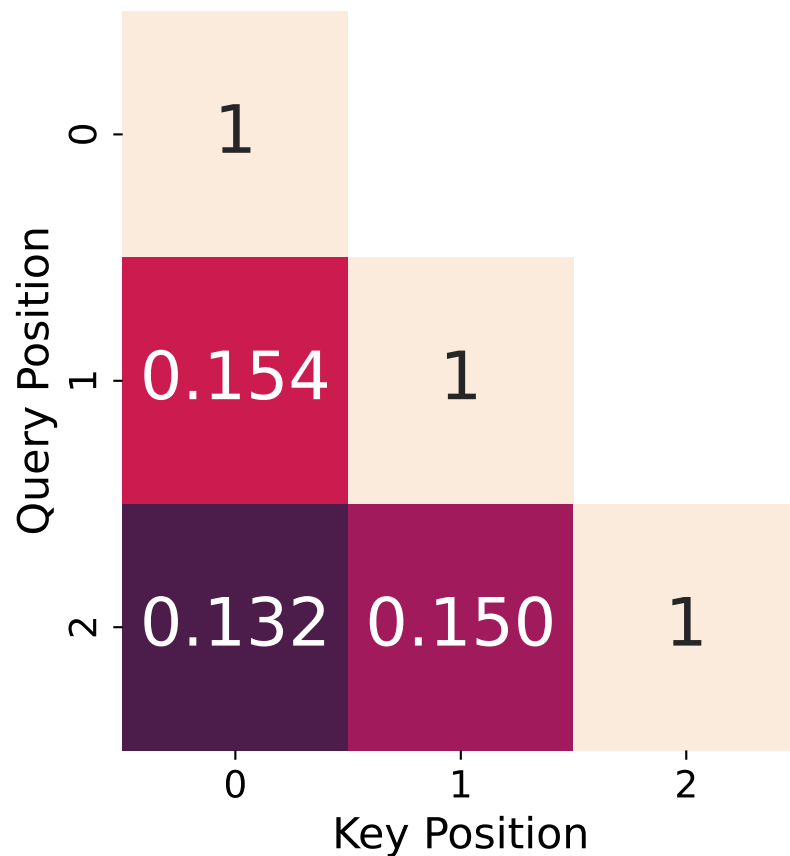

Supplement: supplementary_material [file _math.pdf › figures/_math.pdf]

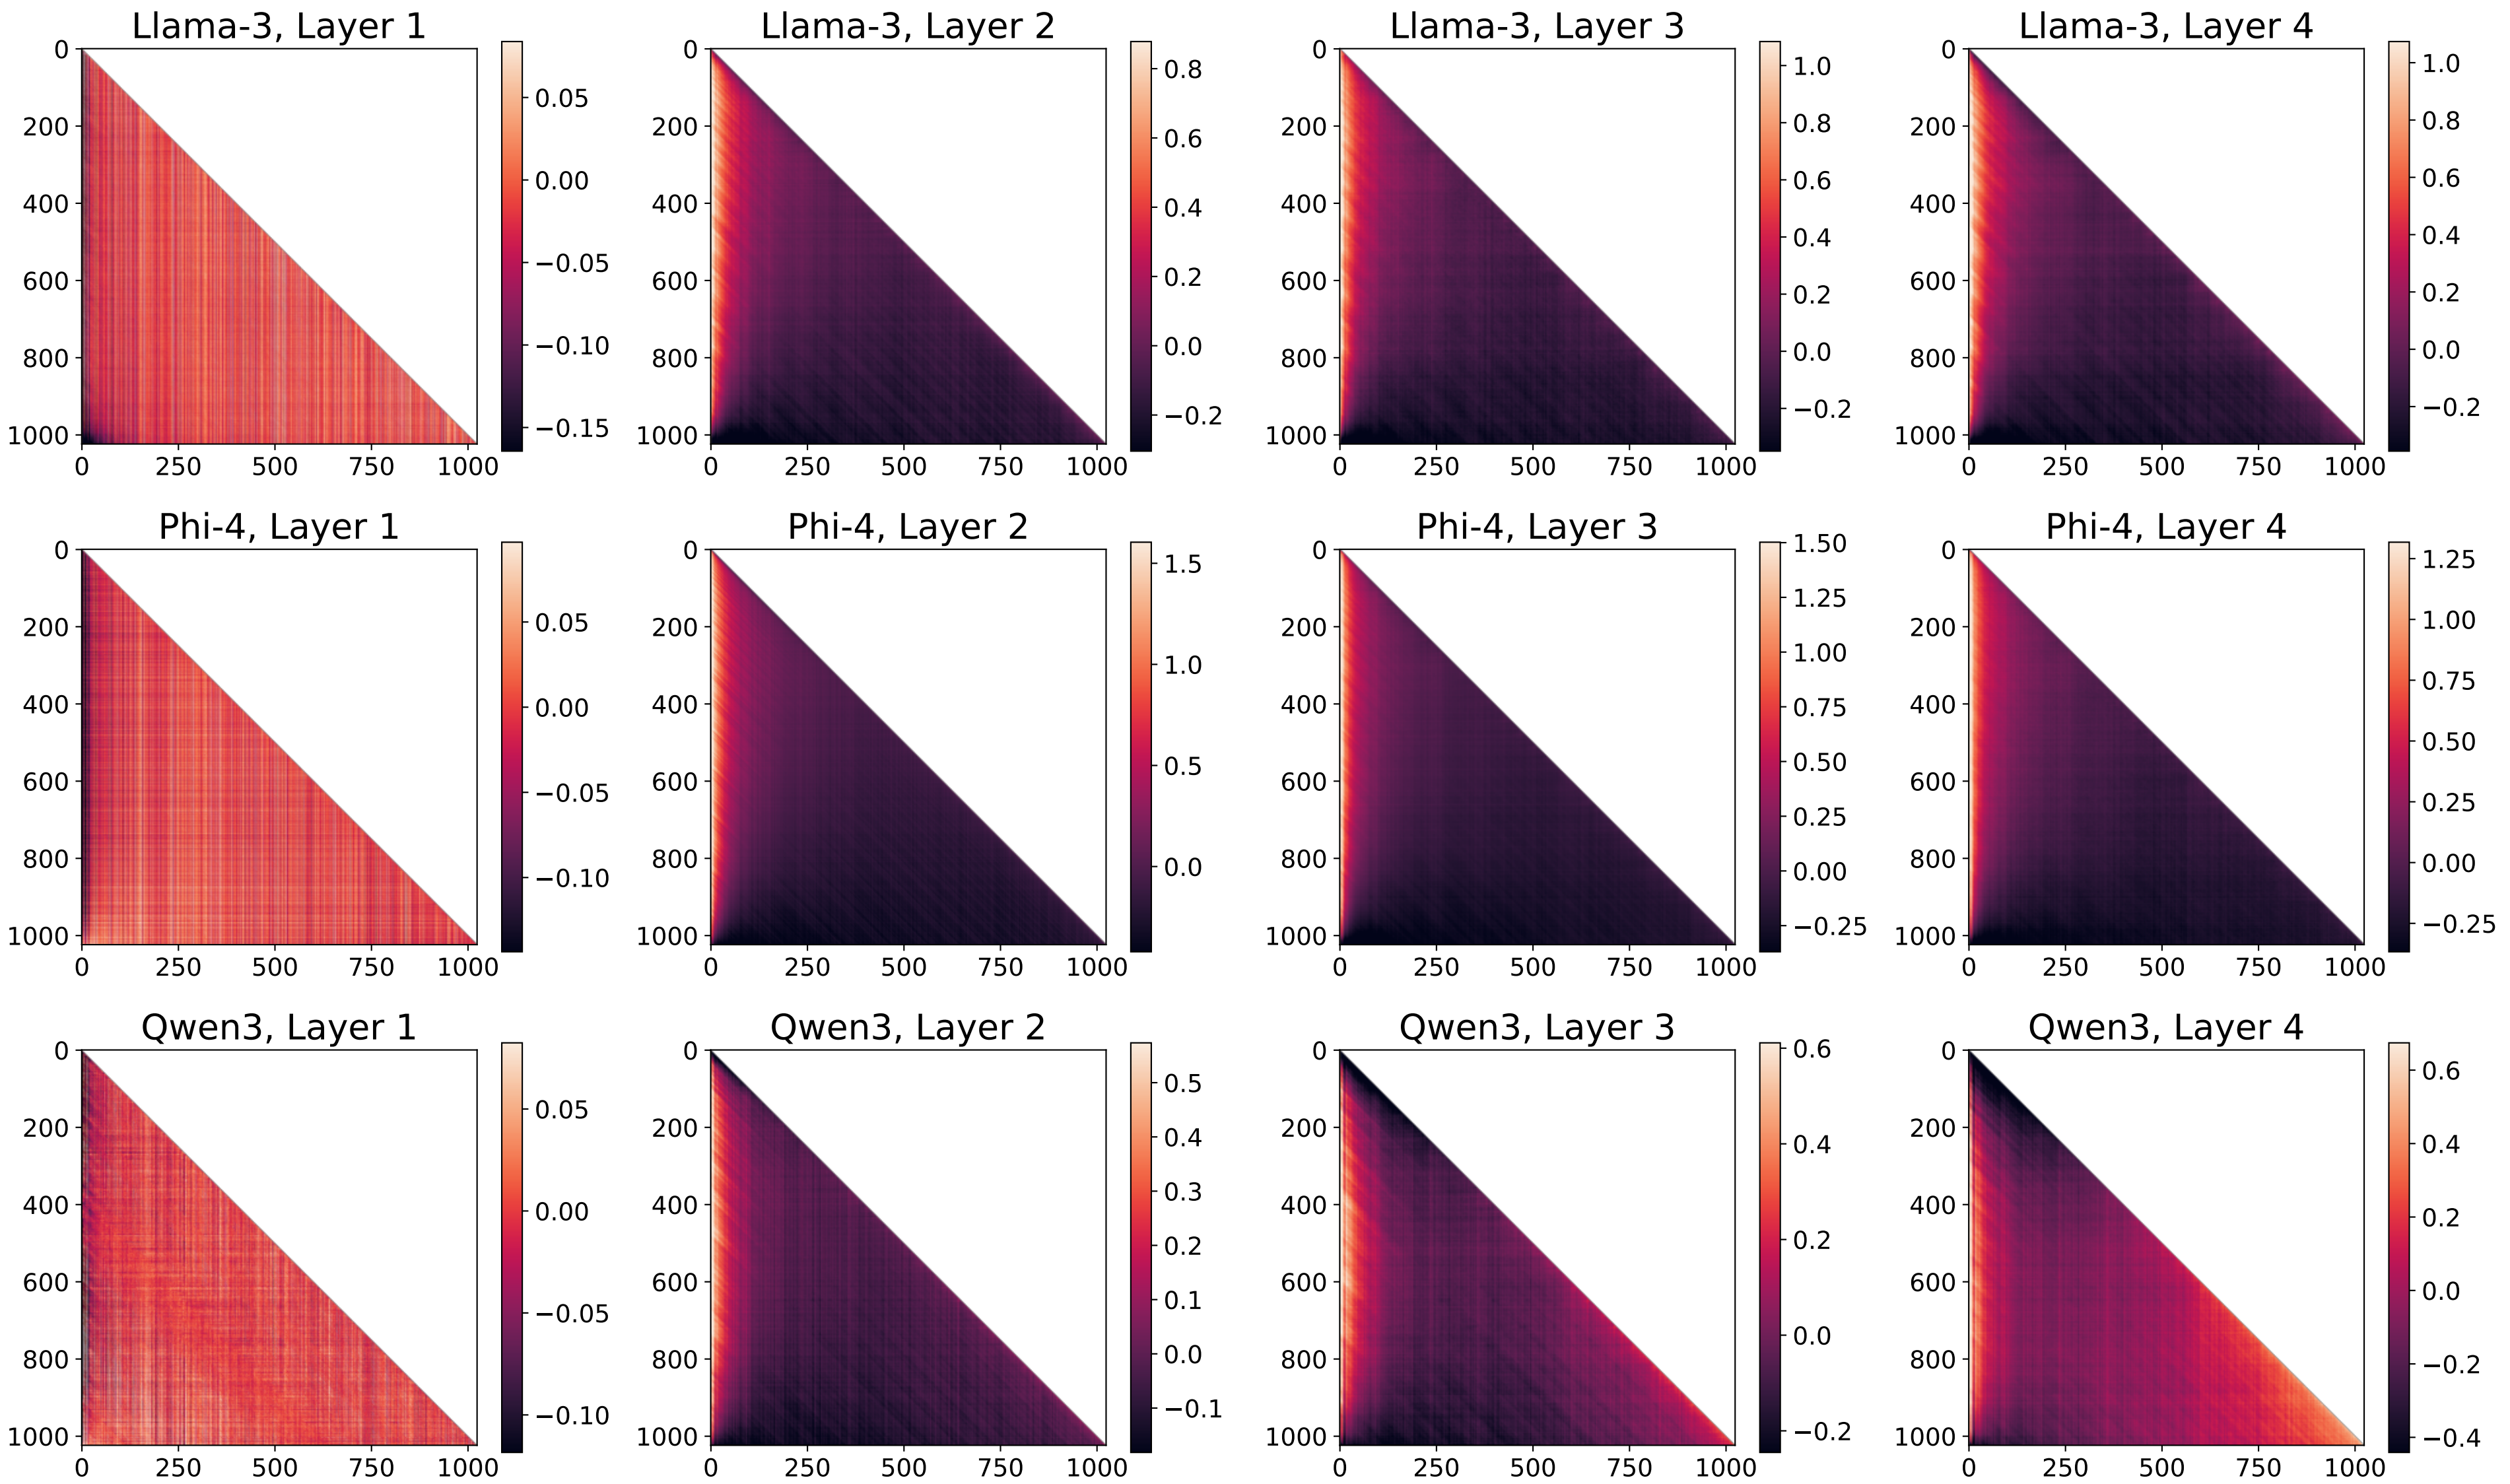

Supplement: supplementary_material [file all_rope.pdf › figures/all_rope.pdf]

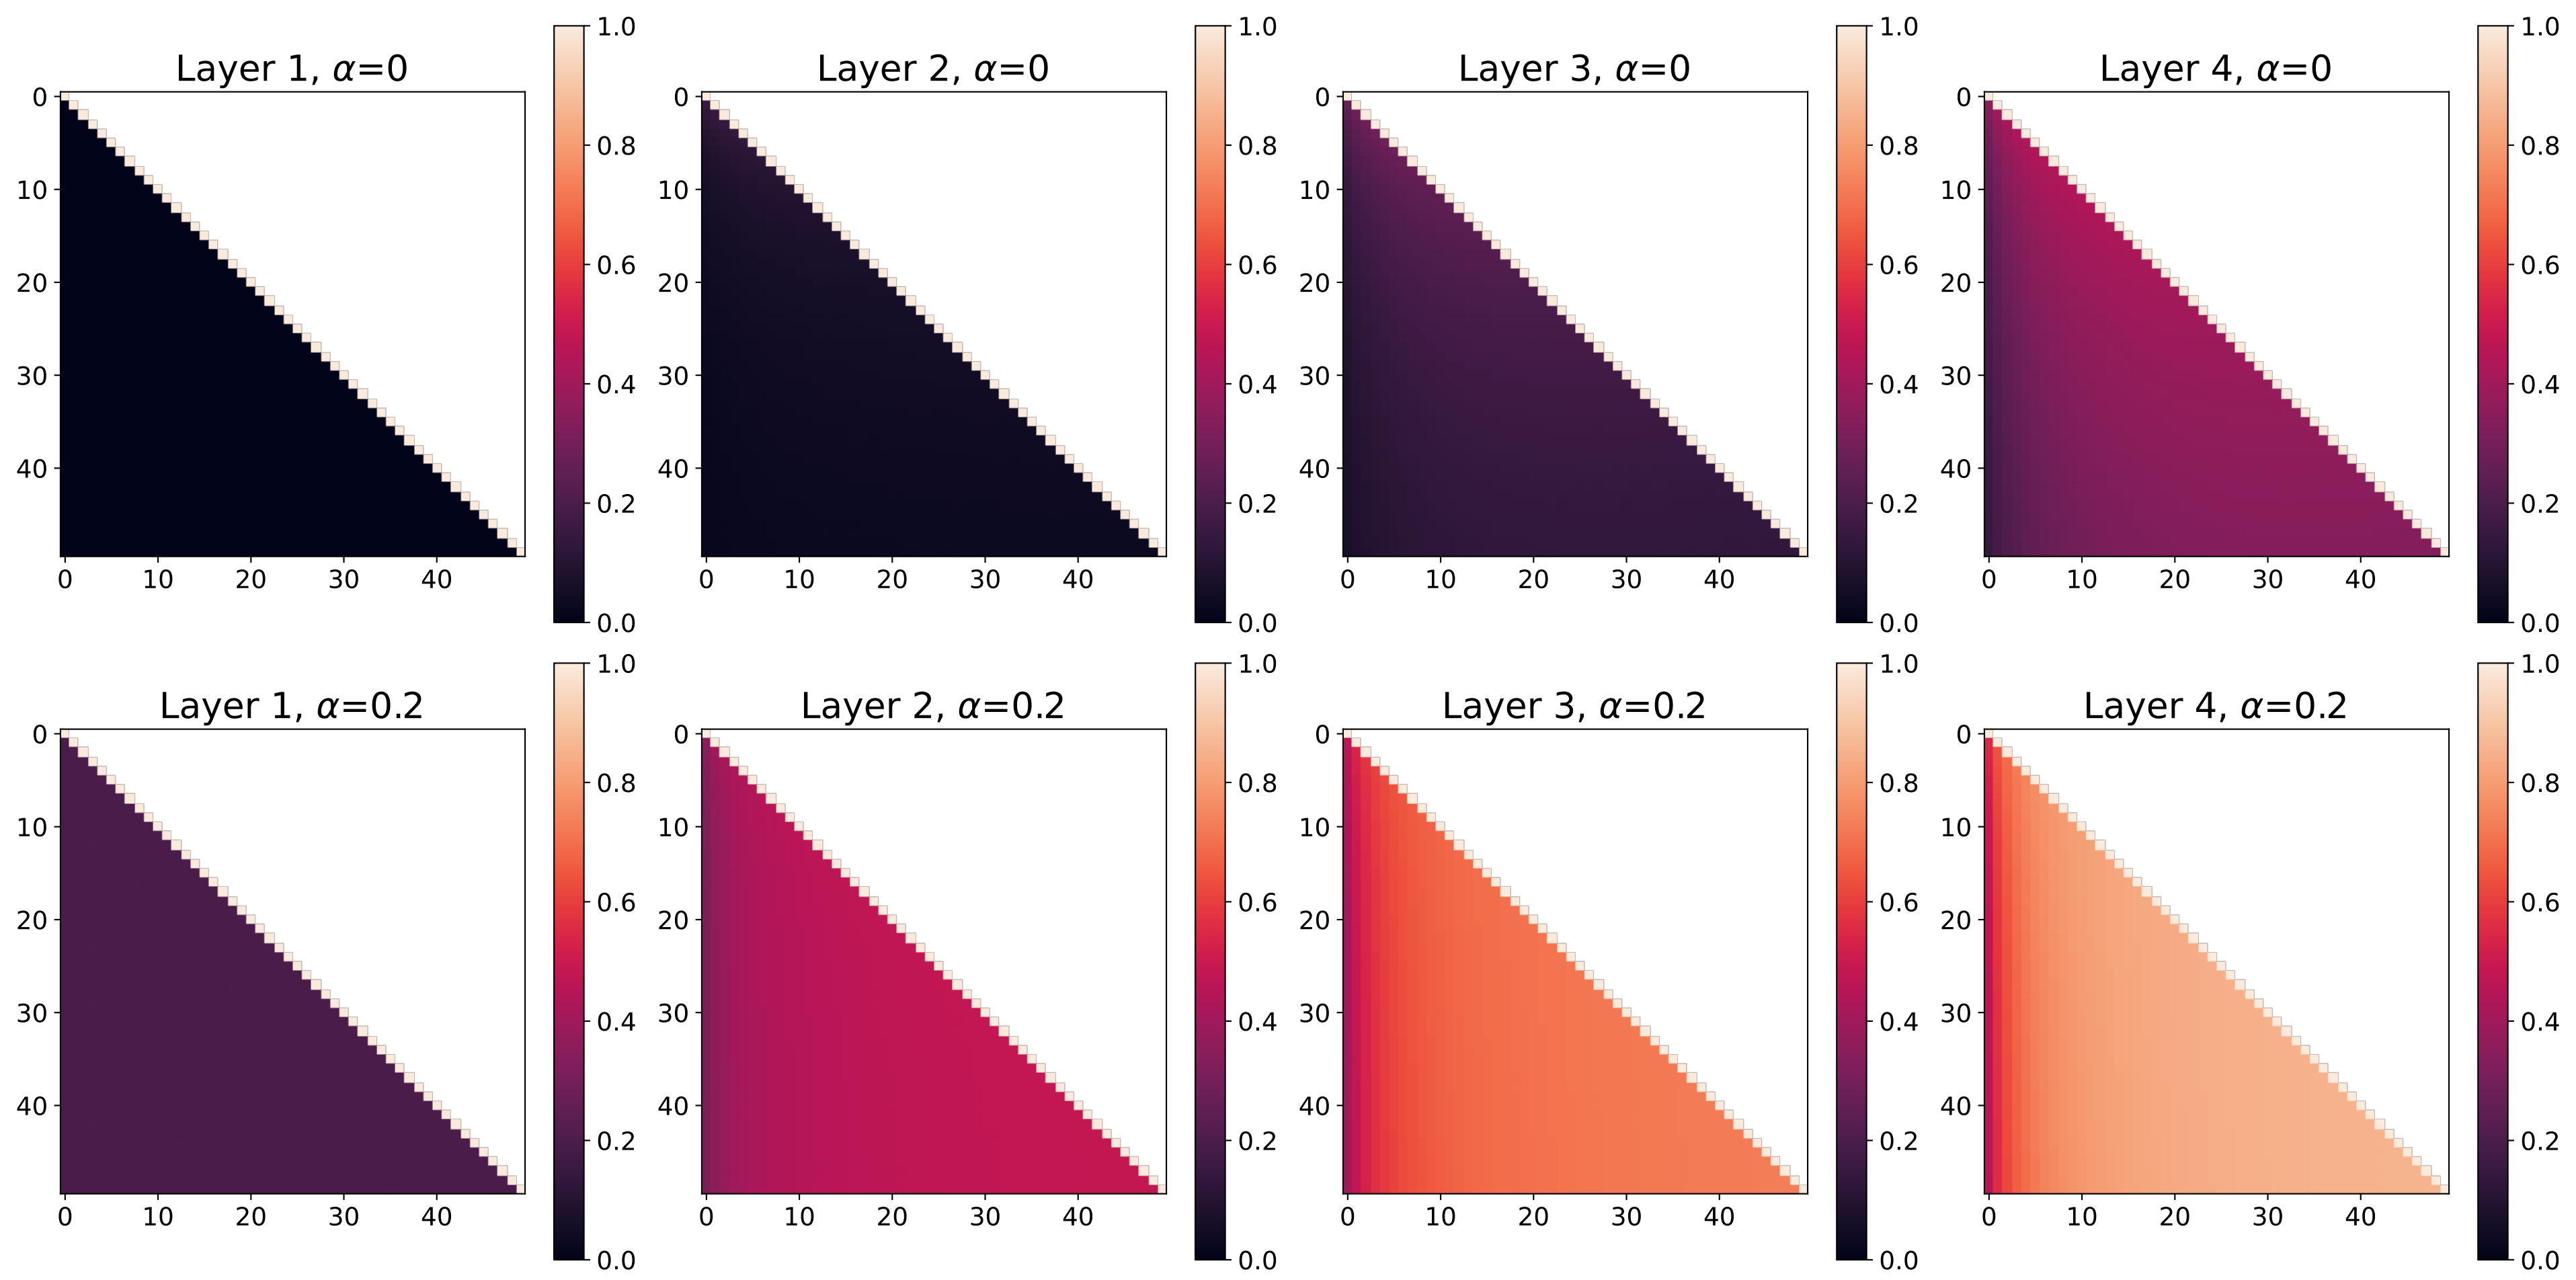

Supplement: supplementary_material [file l2norm.pdf › figures/l2norm.pdf]

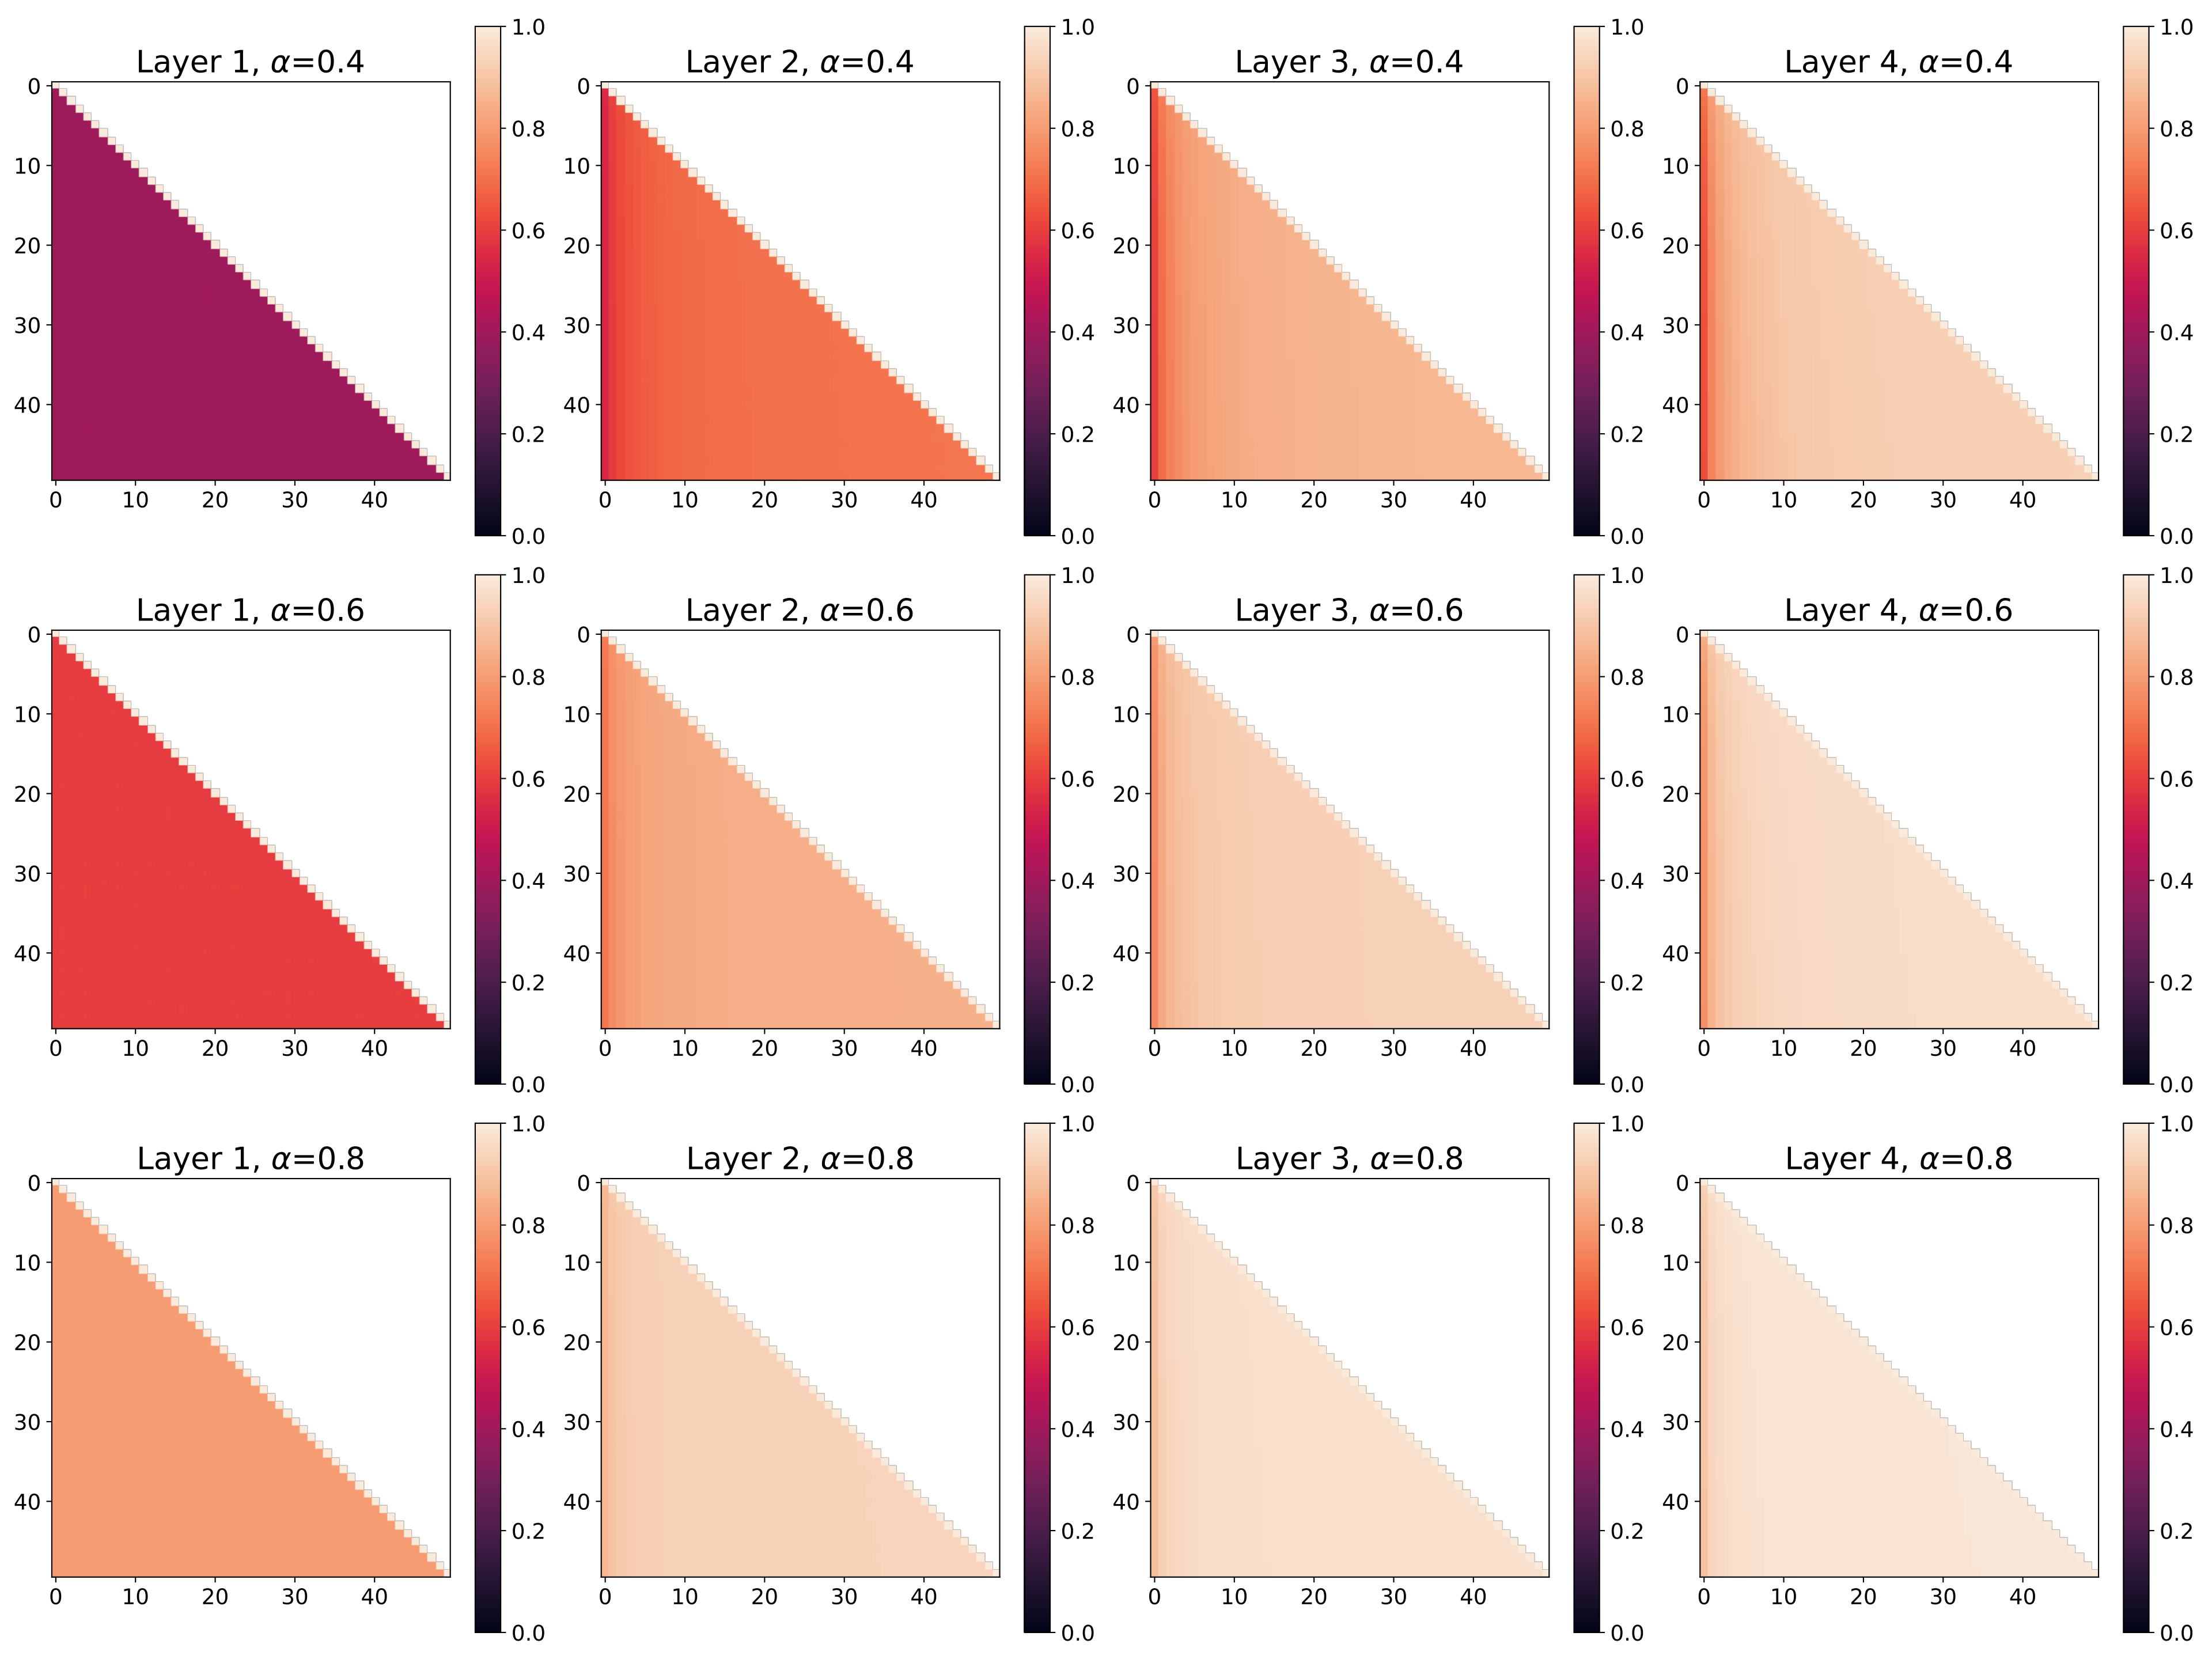

Supplement: supplementary_material [file l2norm_alpha.pdf › figures/l2norm_alpha.pdf]

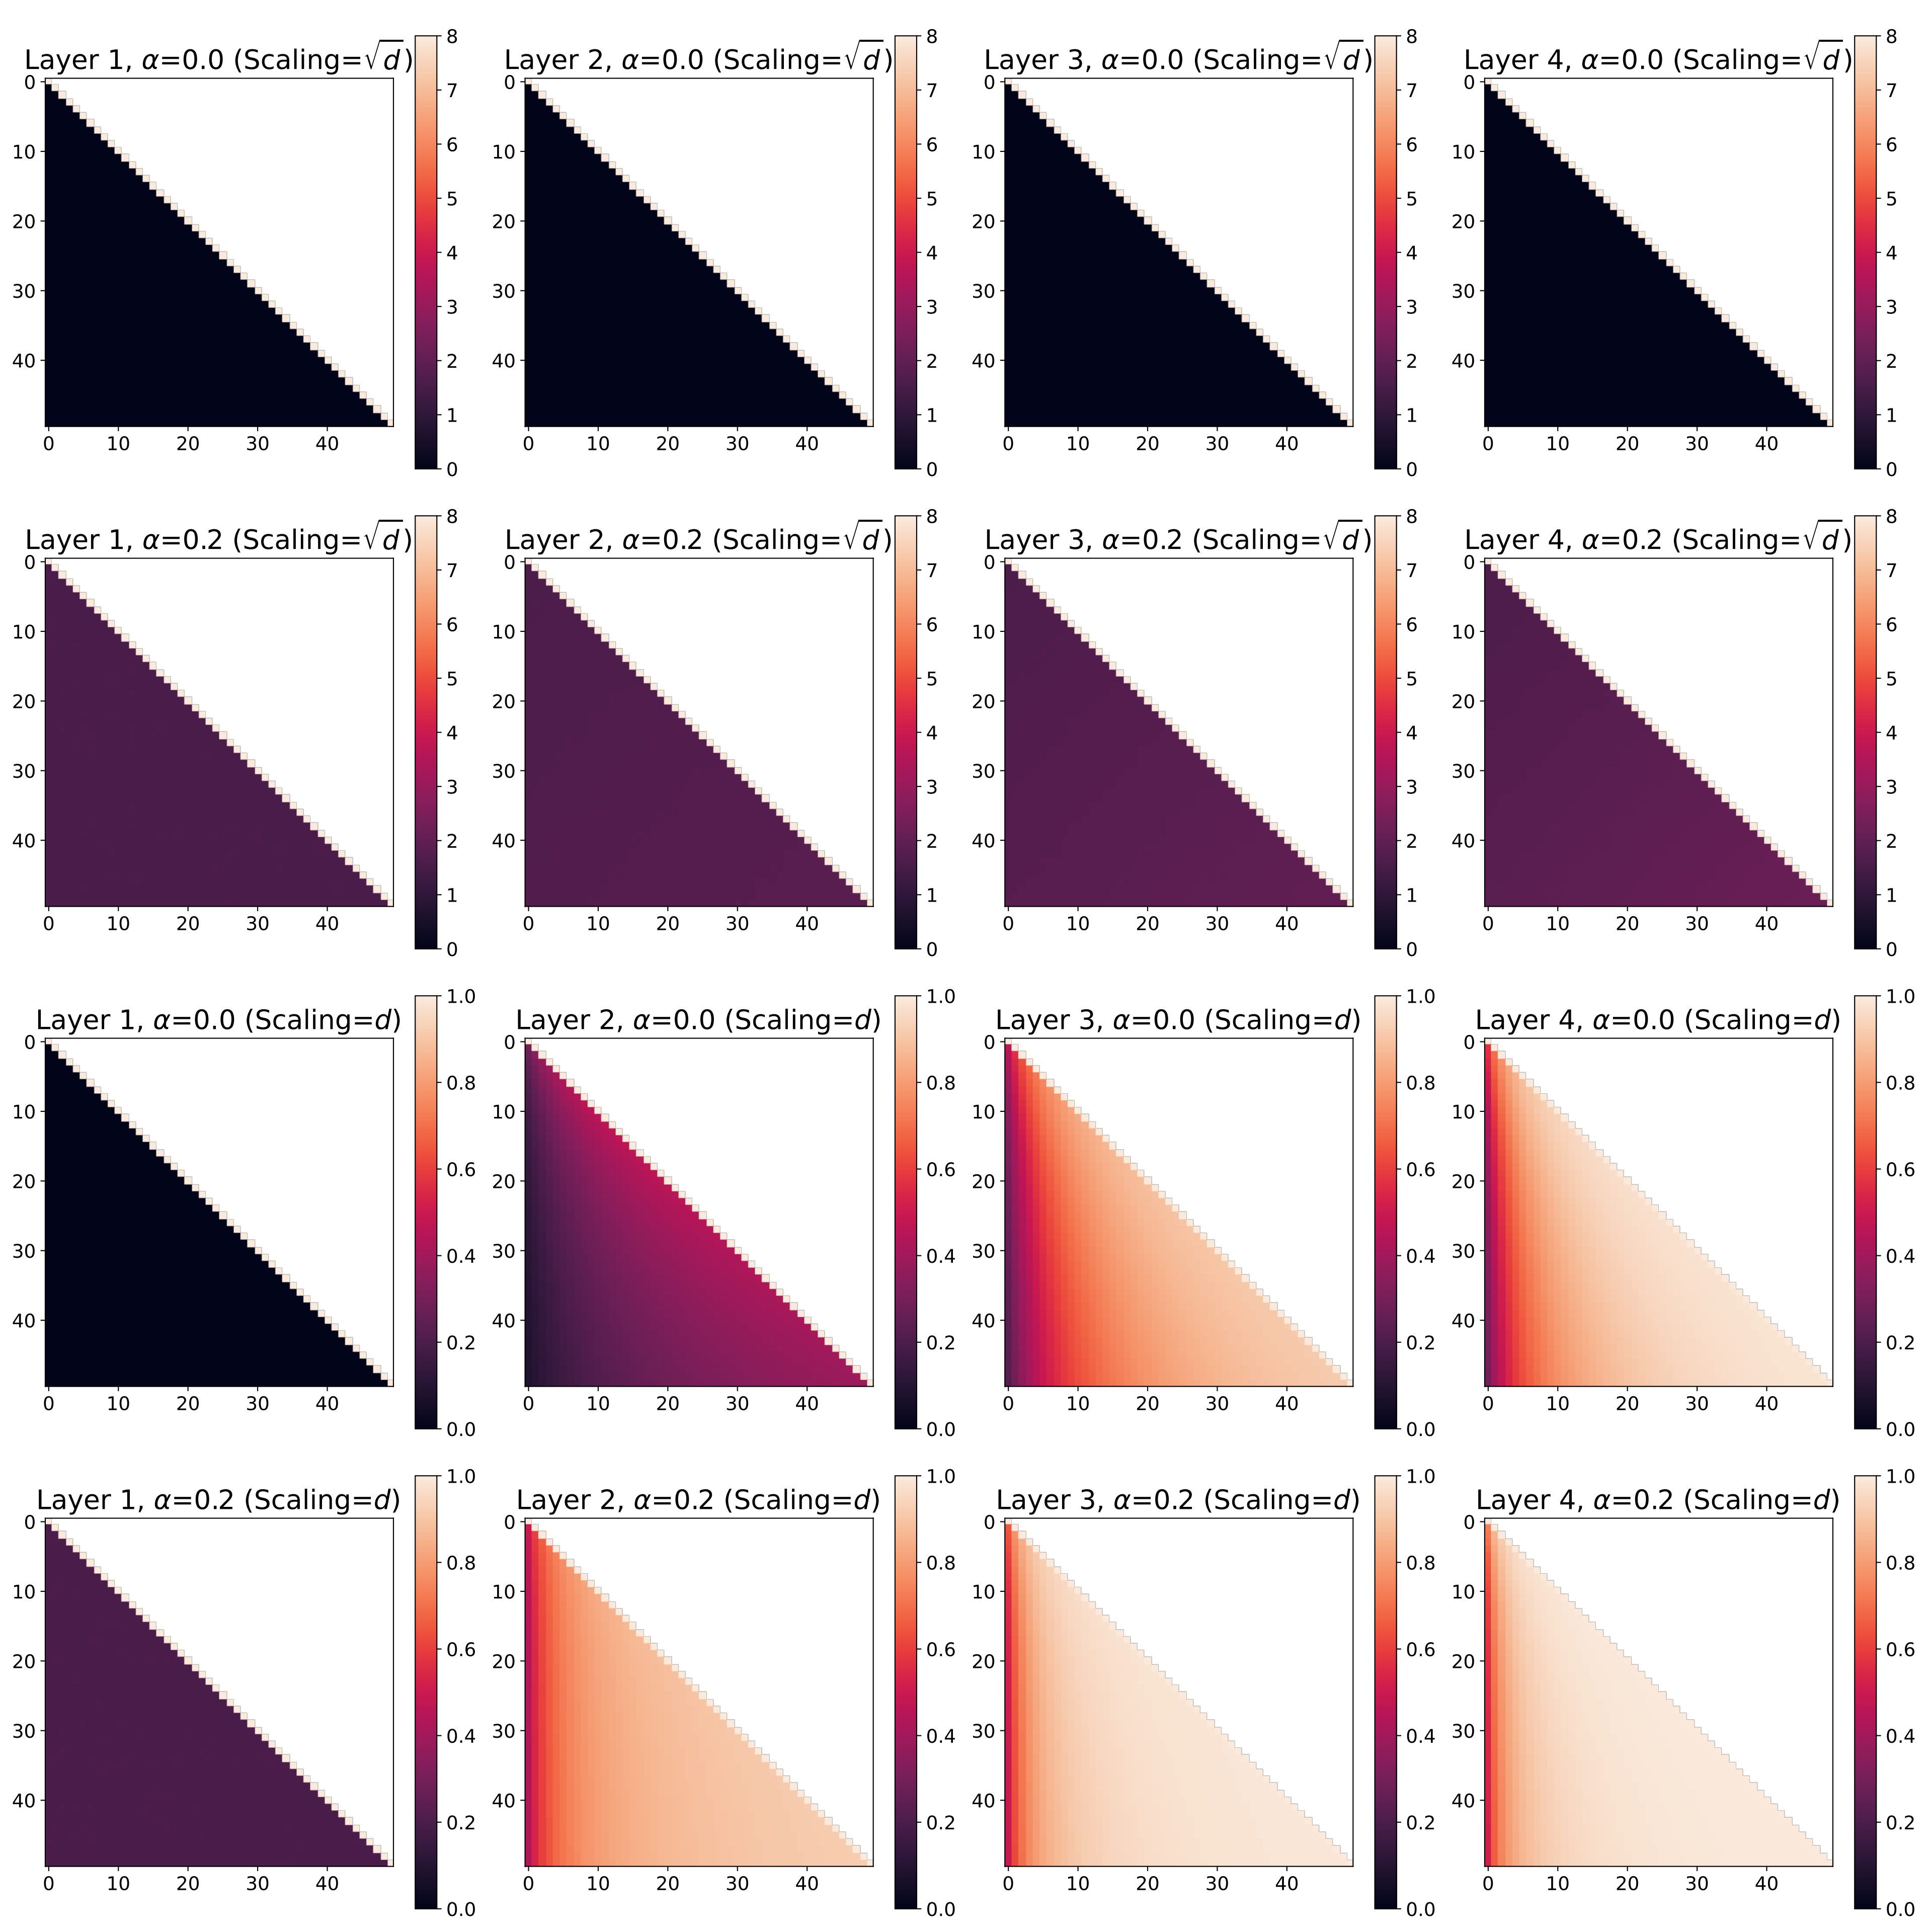

Supplement: supplementary_material [file layernorm.pdf › figures/layernorm.pdf]

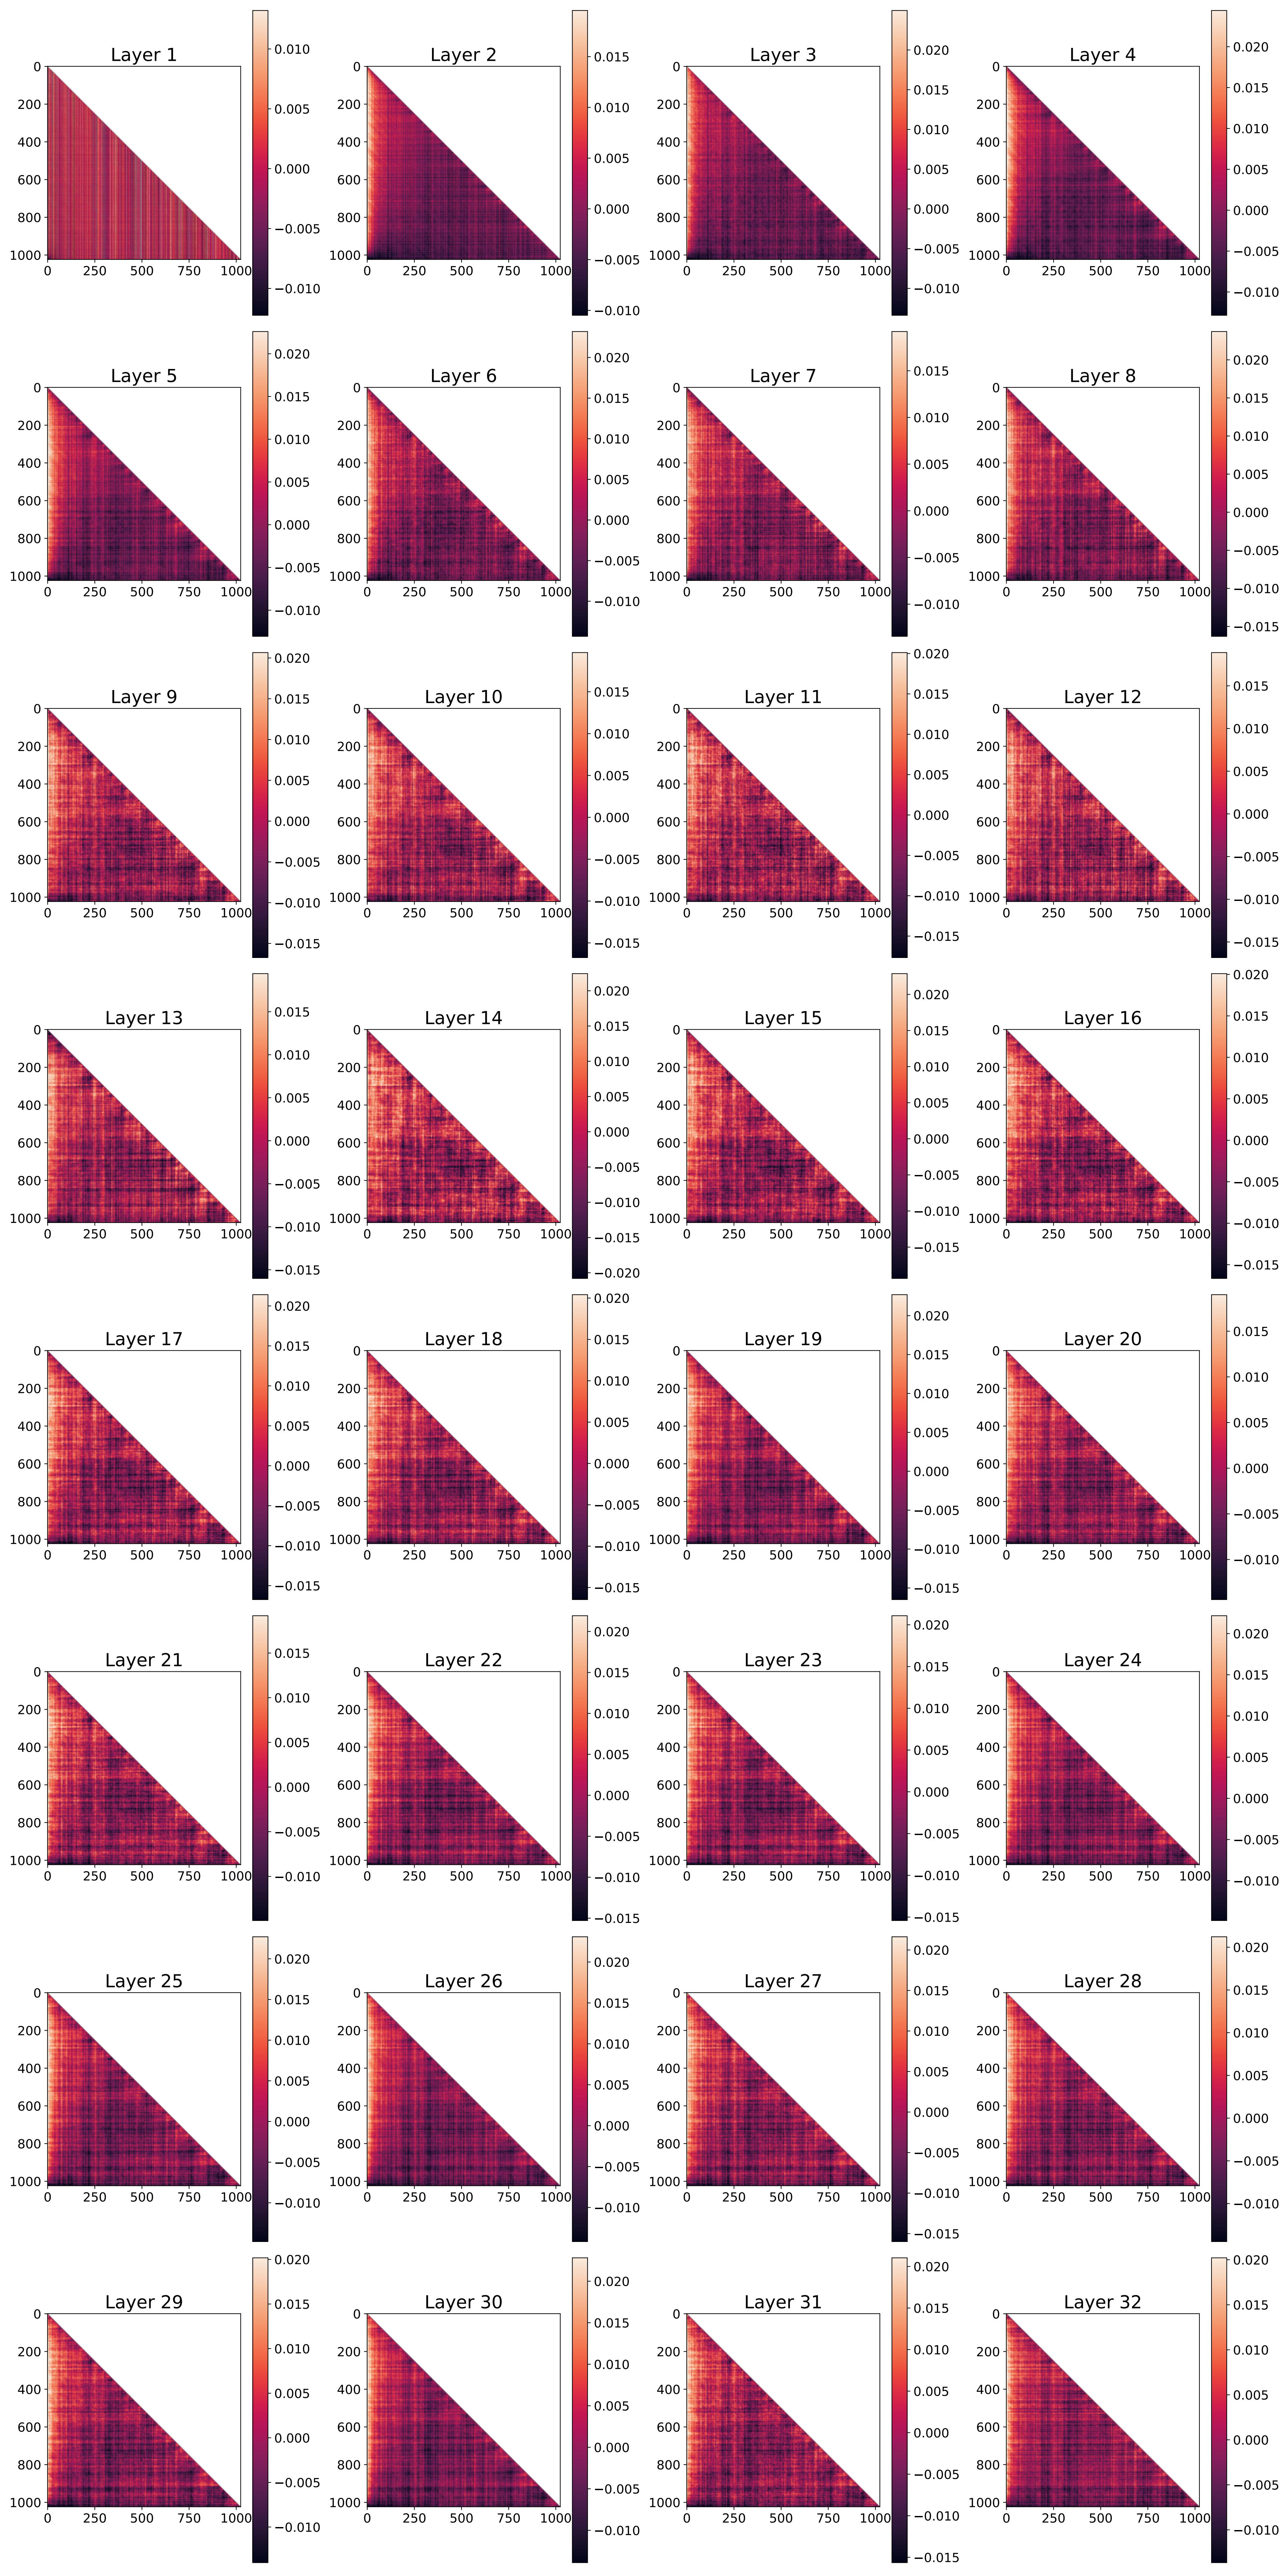

Supplement: supplementary_material [file llama3_rope_norm.pdf › figures/llama3_rope_norm.pdf]

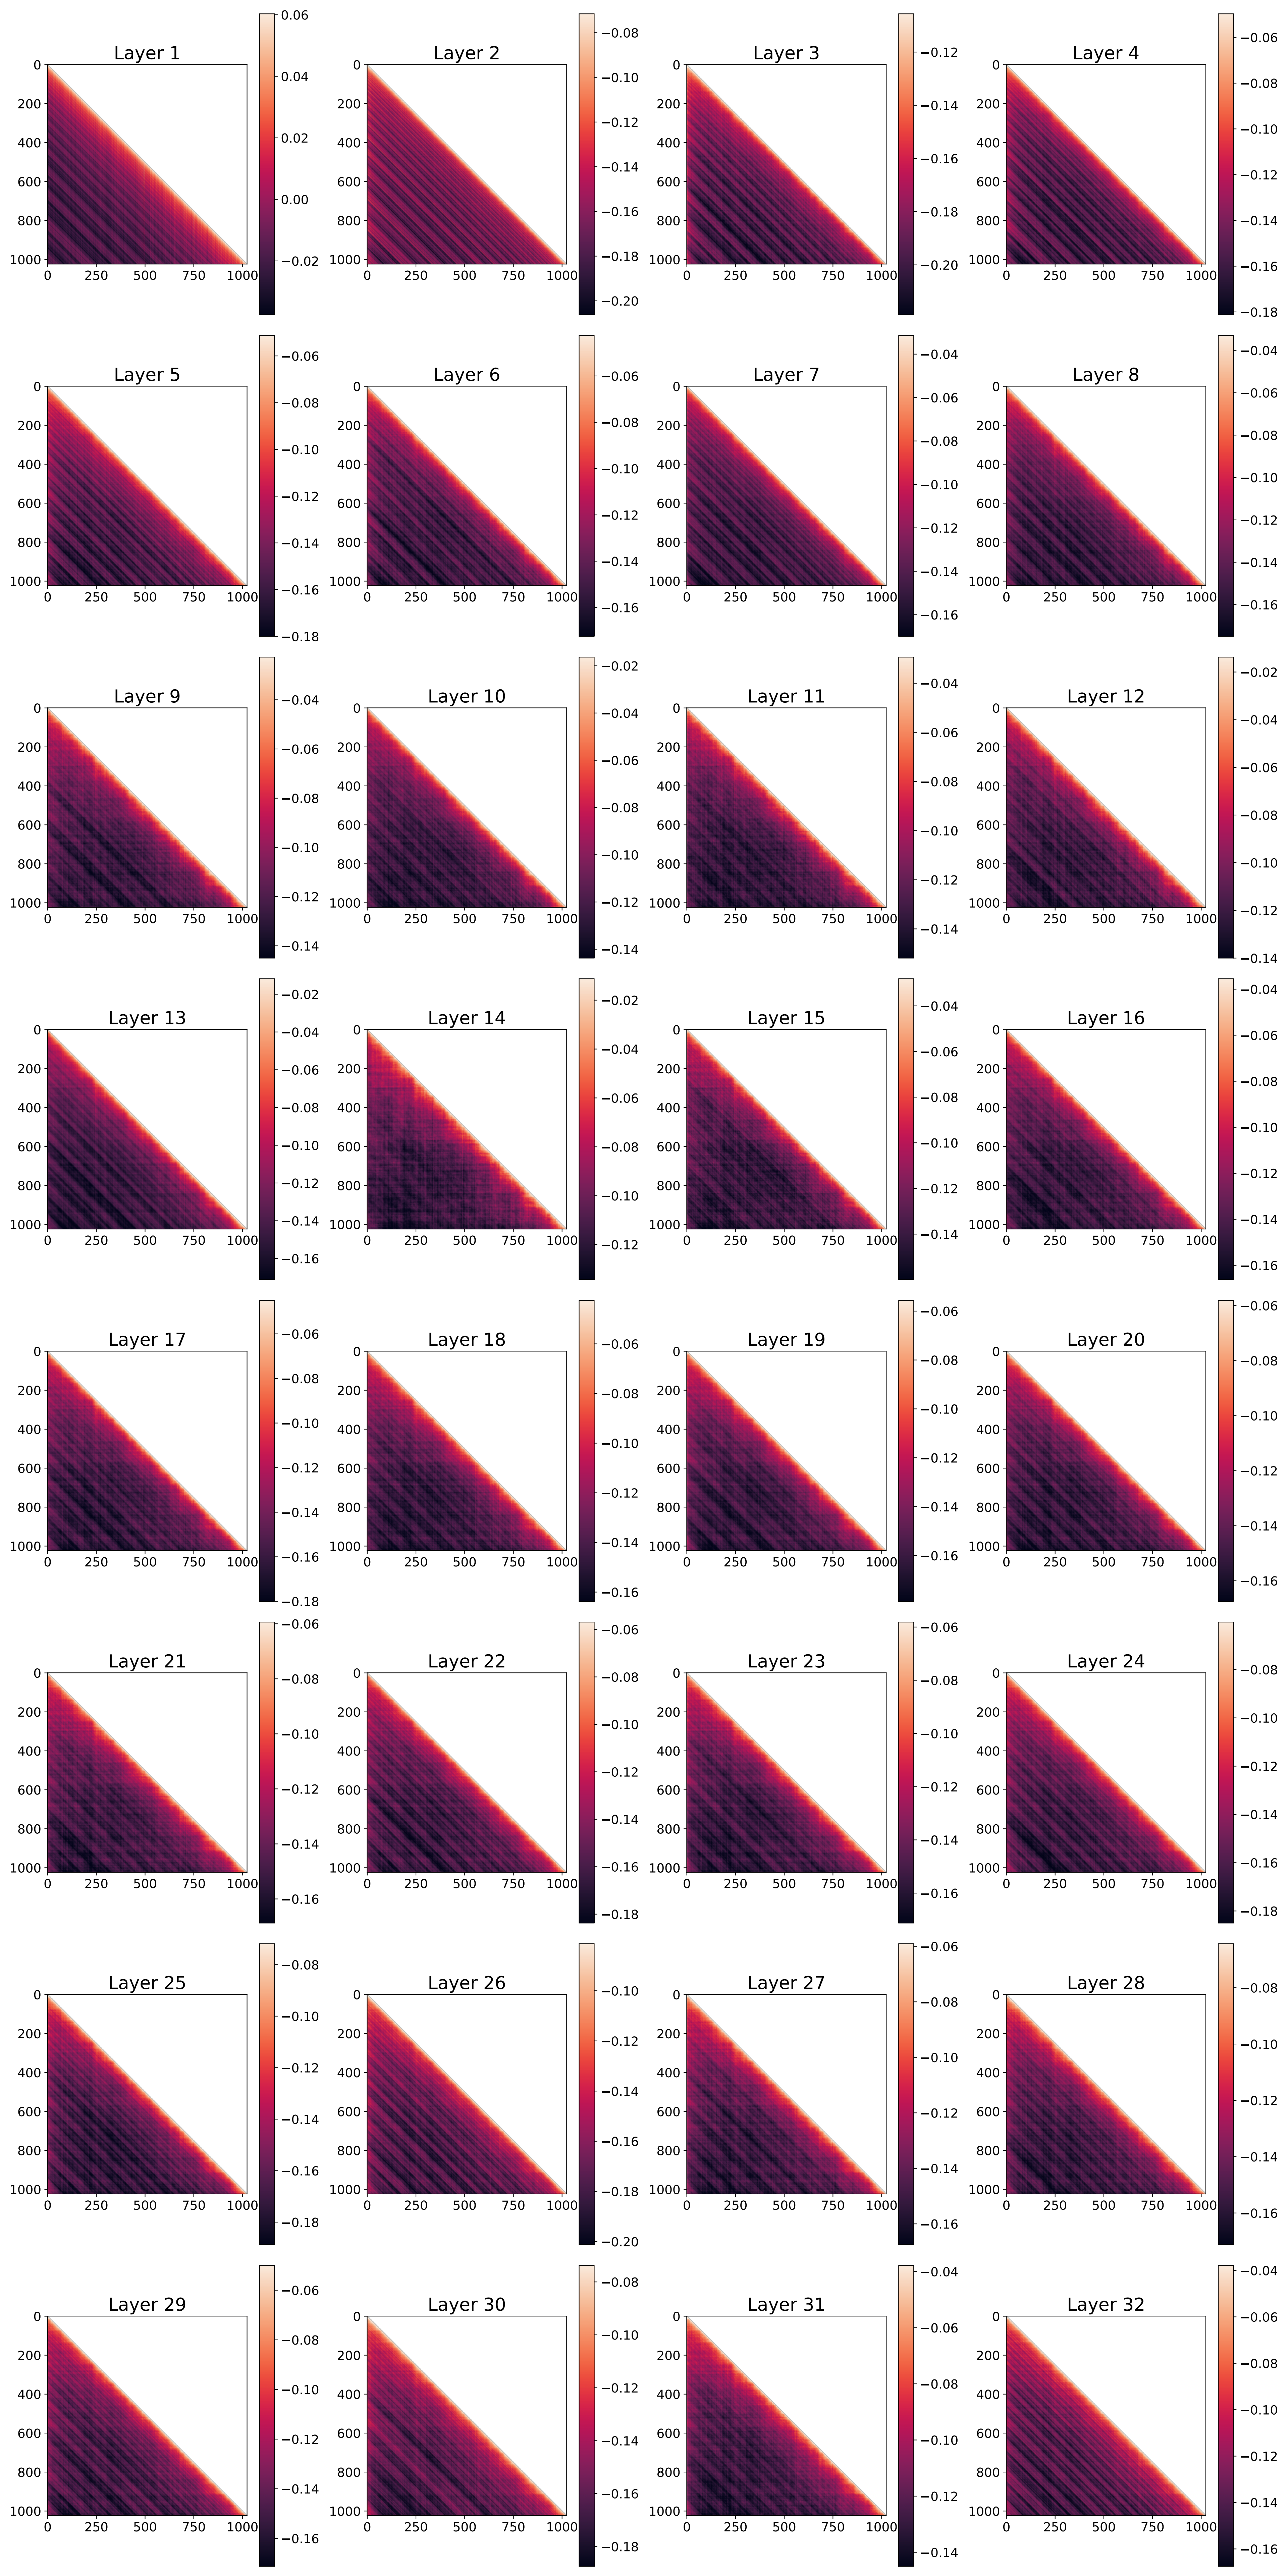

Supplement: supplementary_material [file llama3_rope_orig.pdf › figures/llama3_rope_orig.pdf]

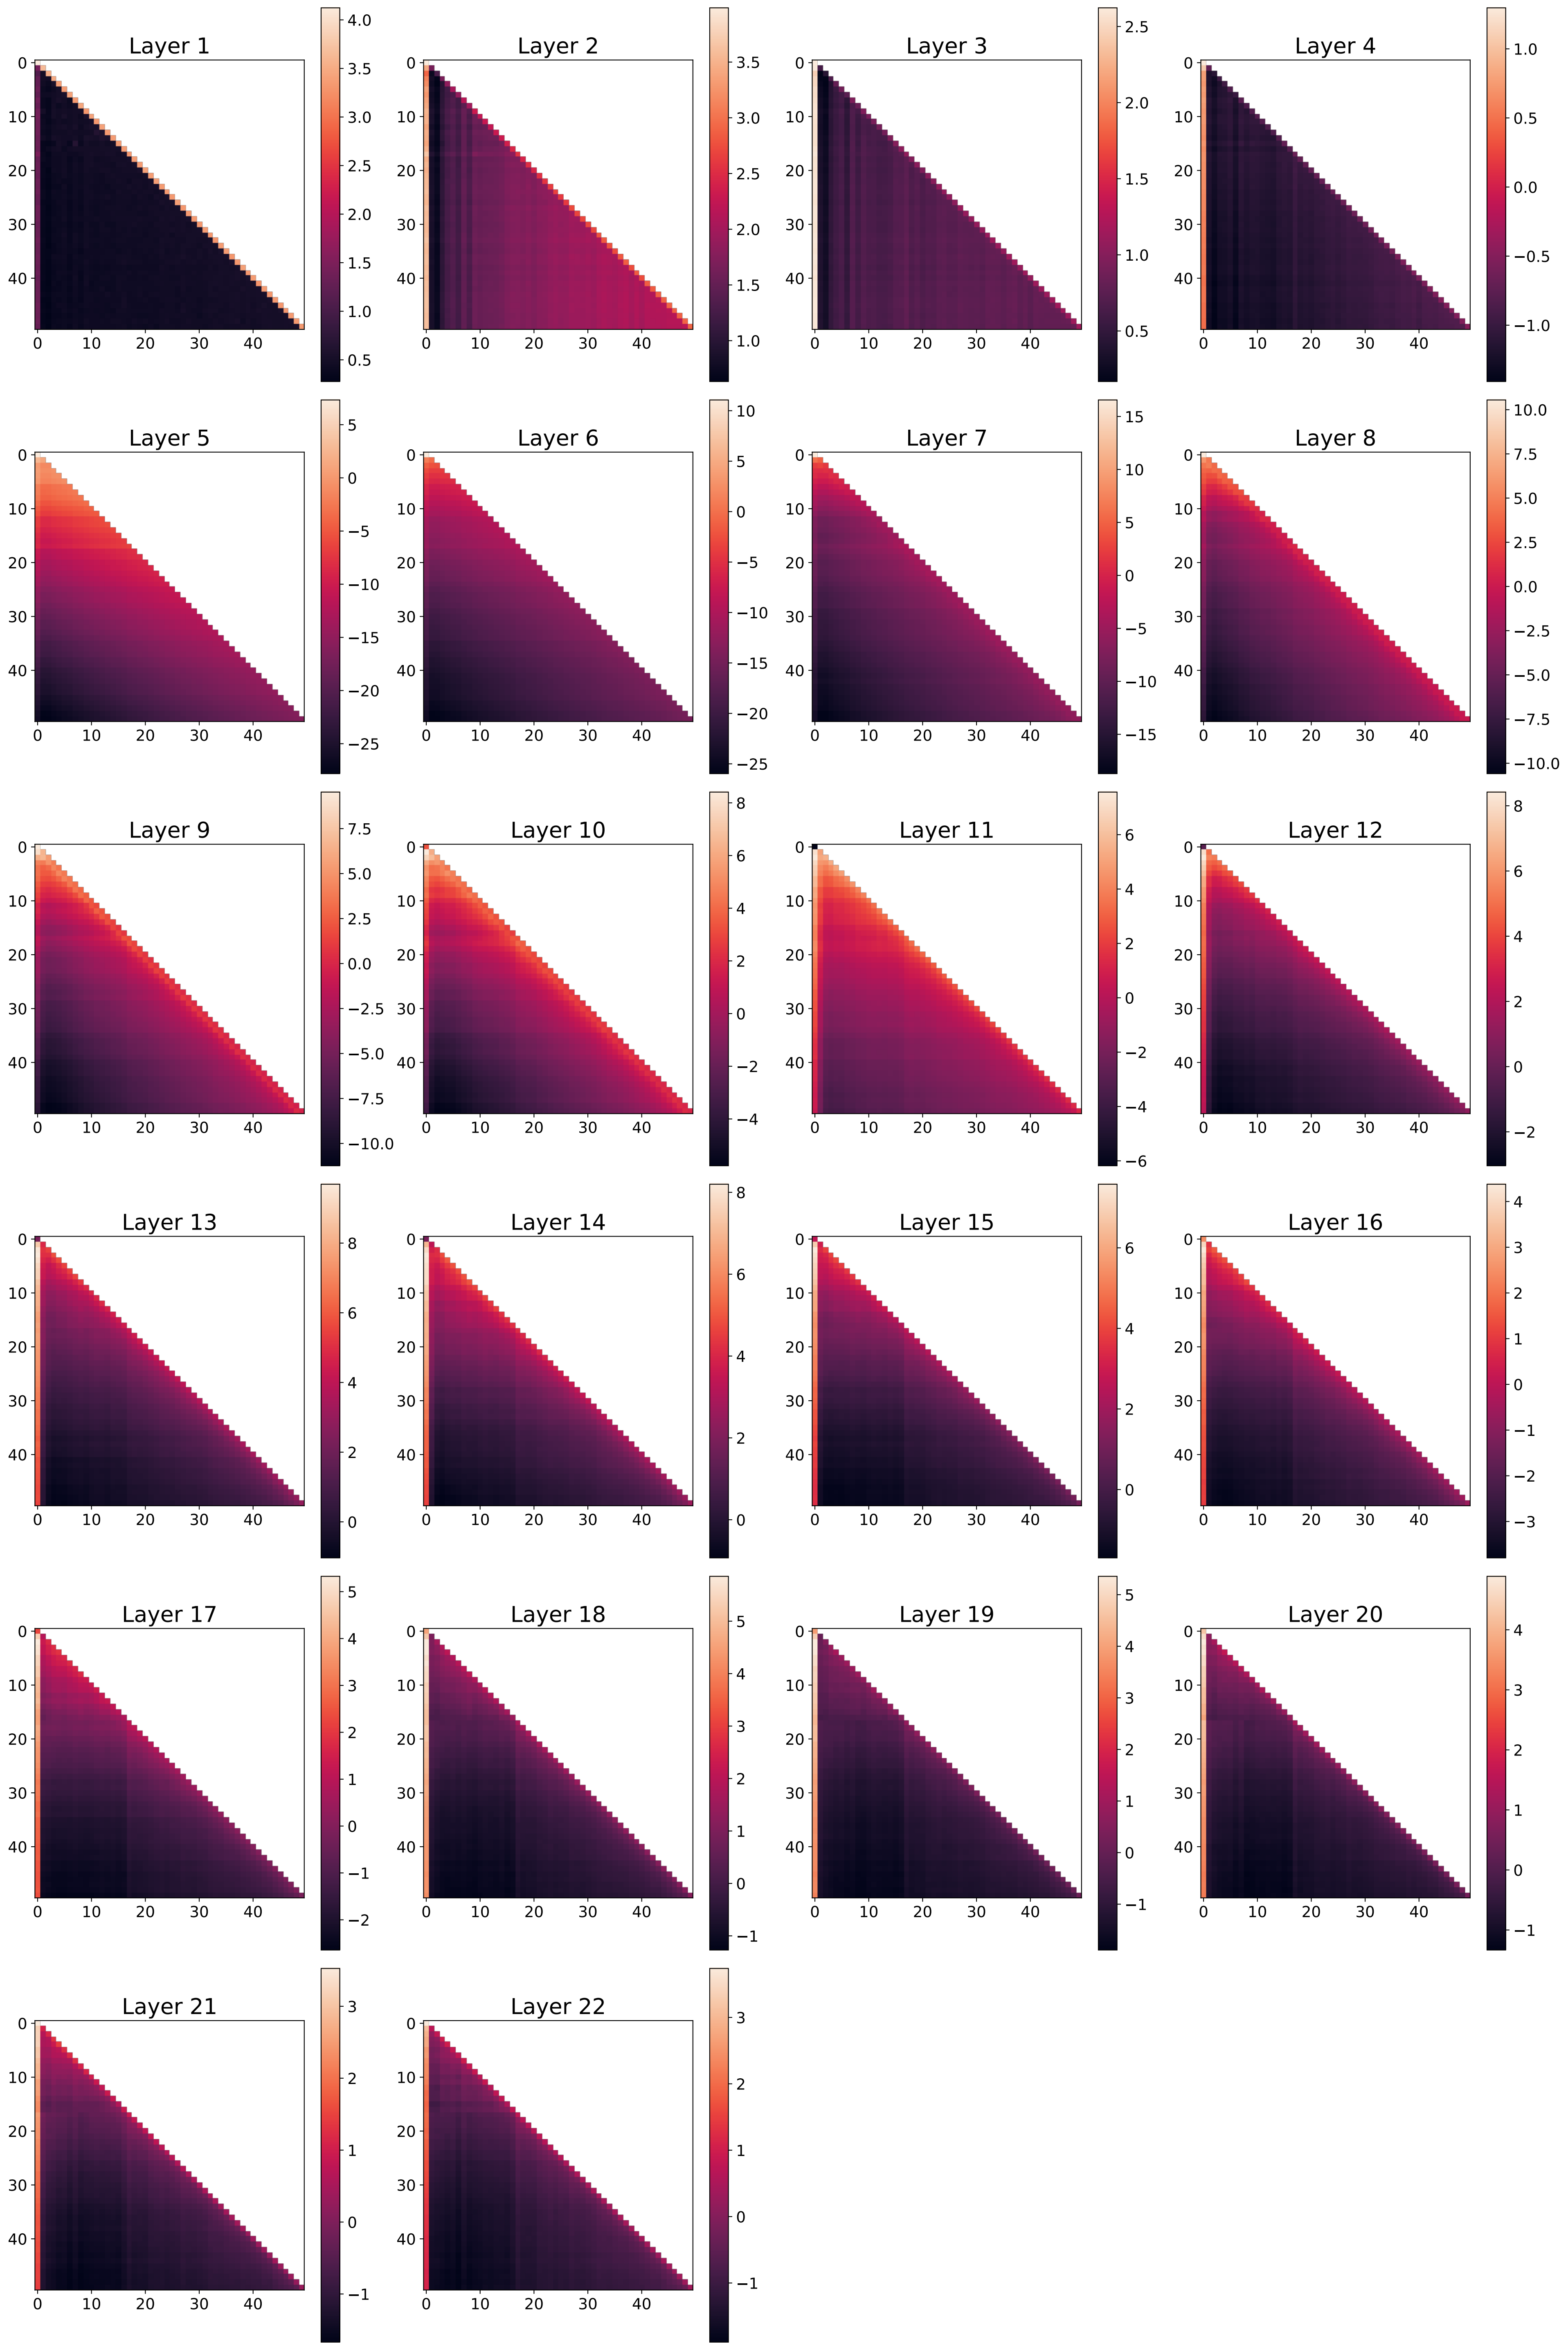

Supplement: supplementary_material [file nope_attns_all.pdf › figures/nope_attns_all.pdf]

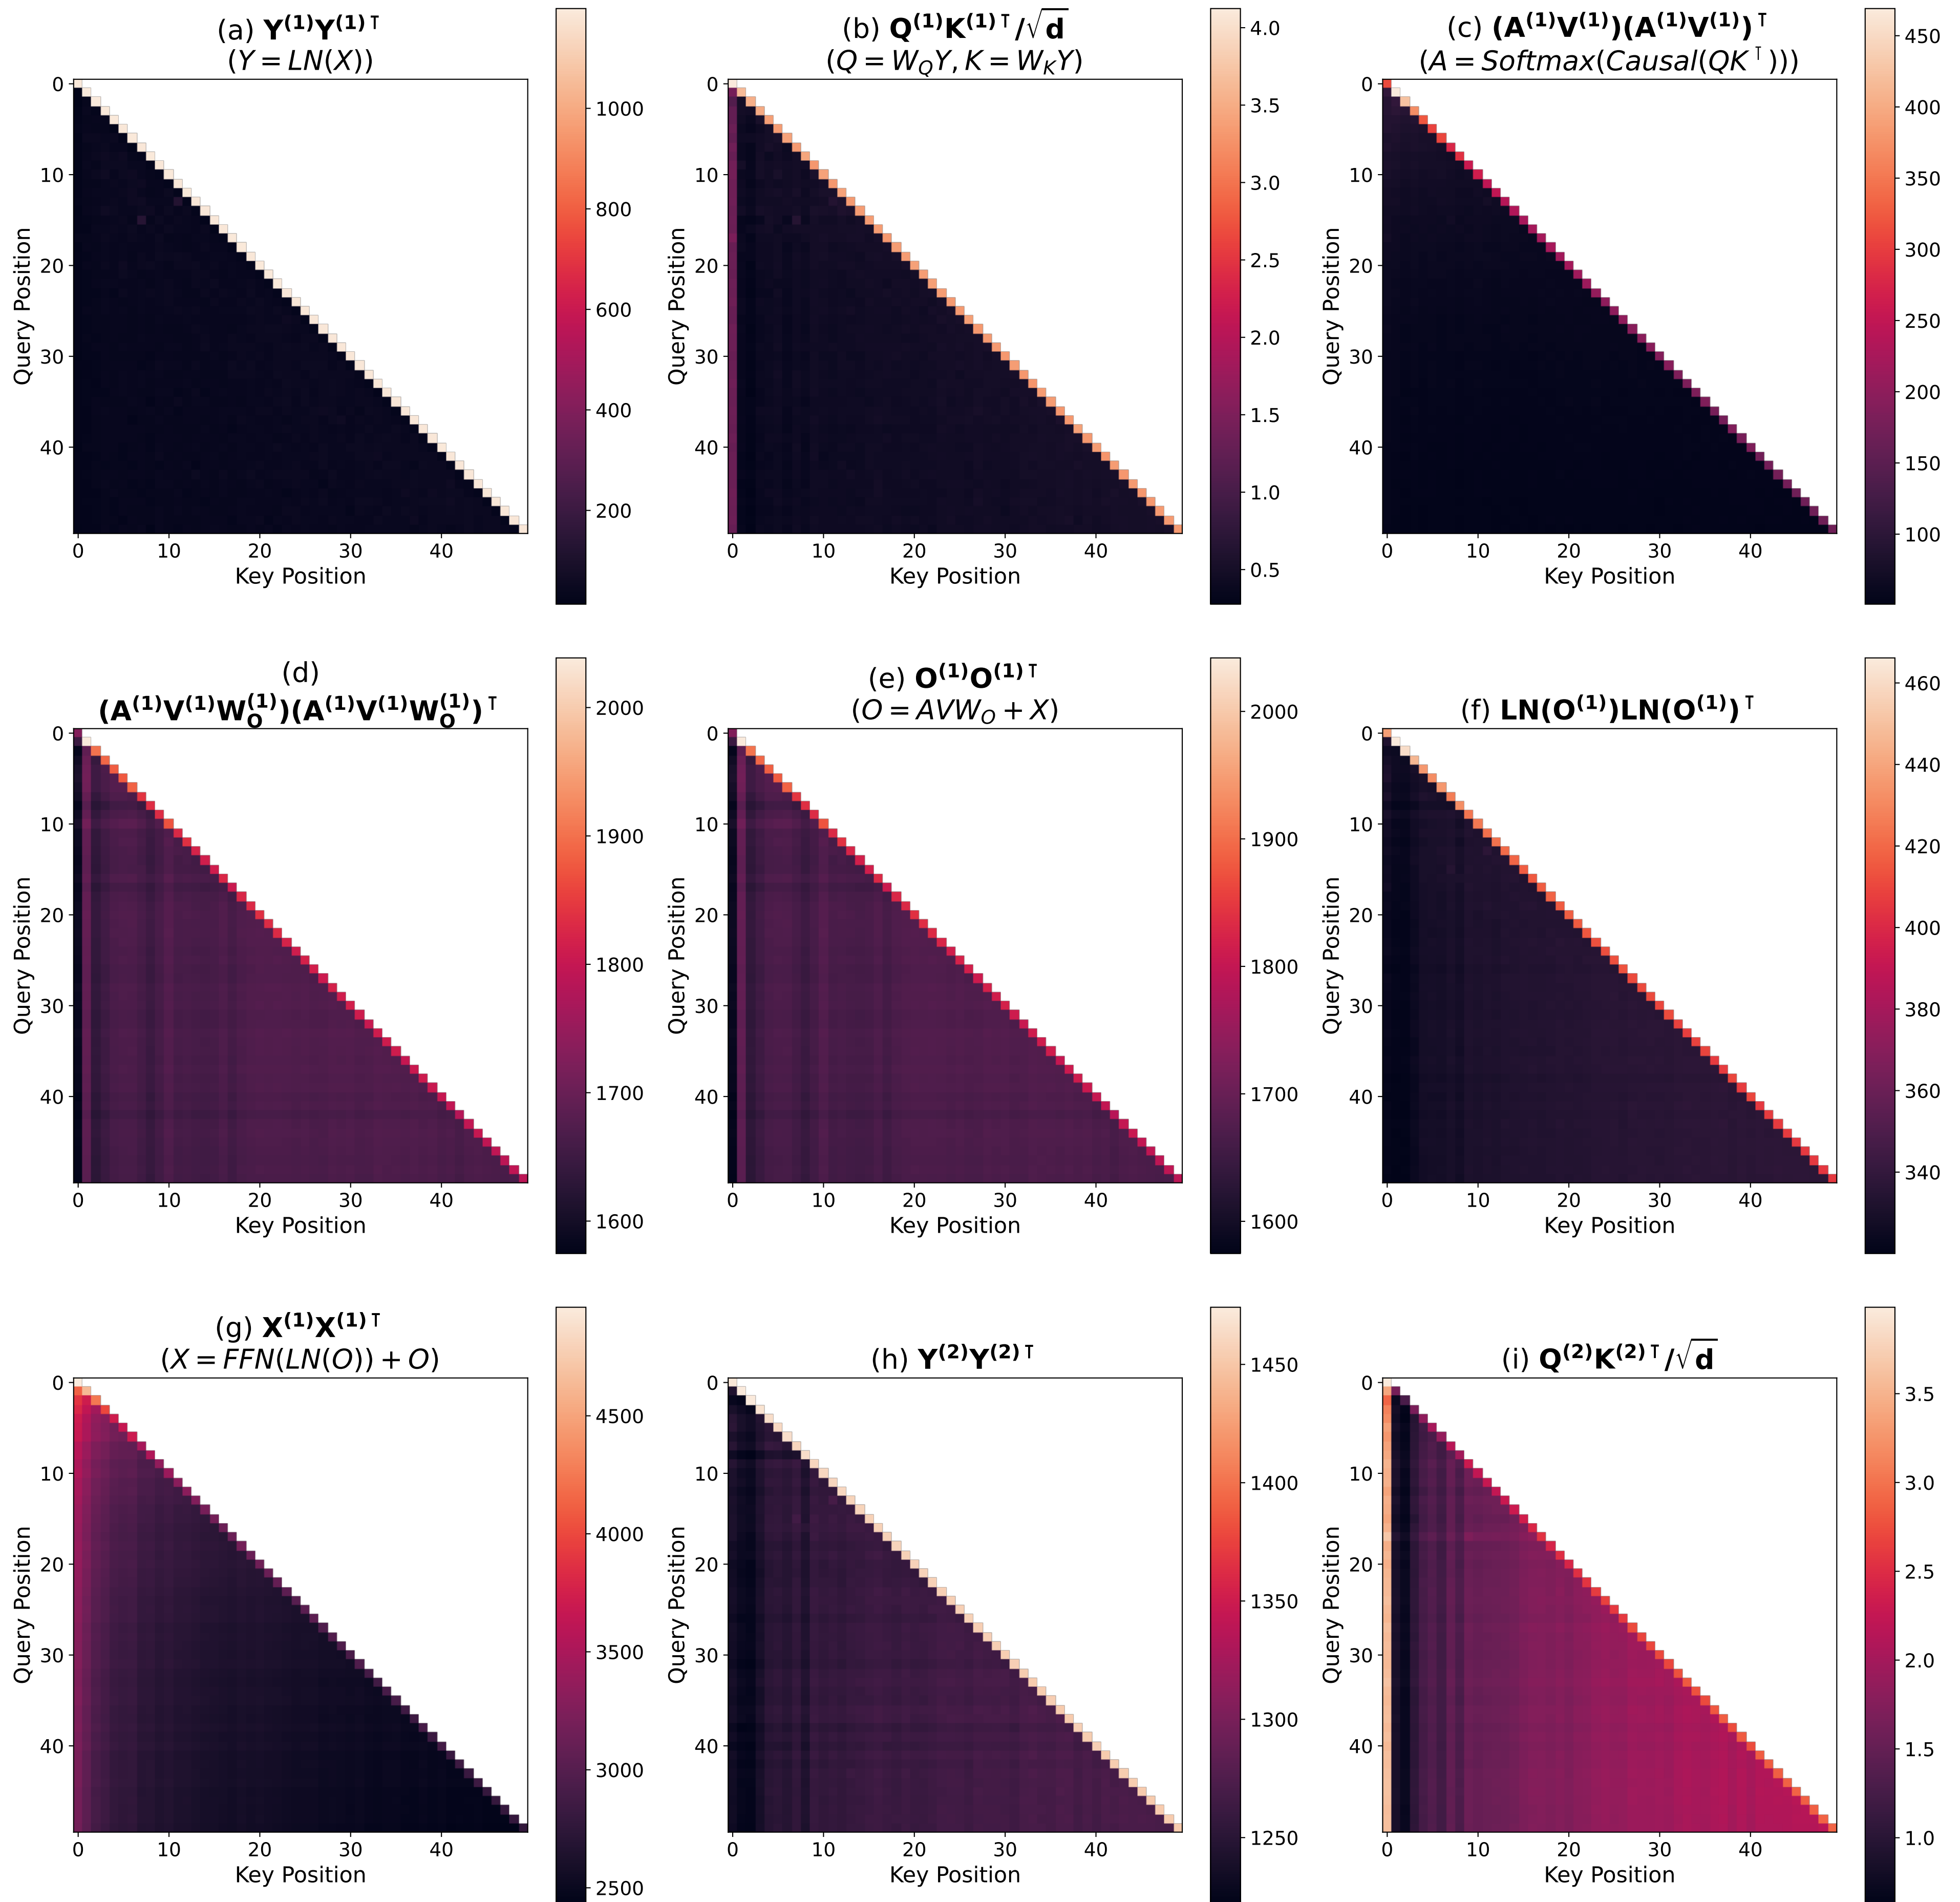

Supplement: supplementary_material [file nope_params.pdf › figures/nope_params.pdf]

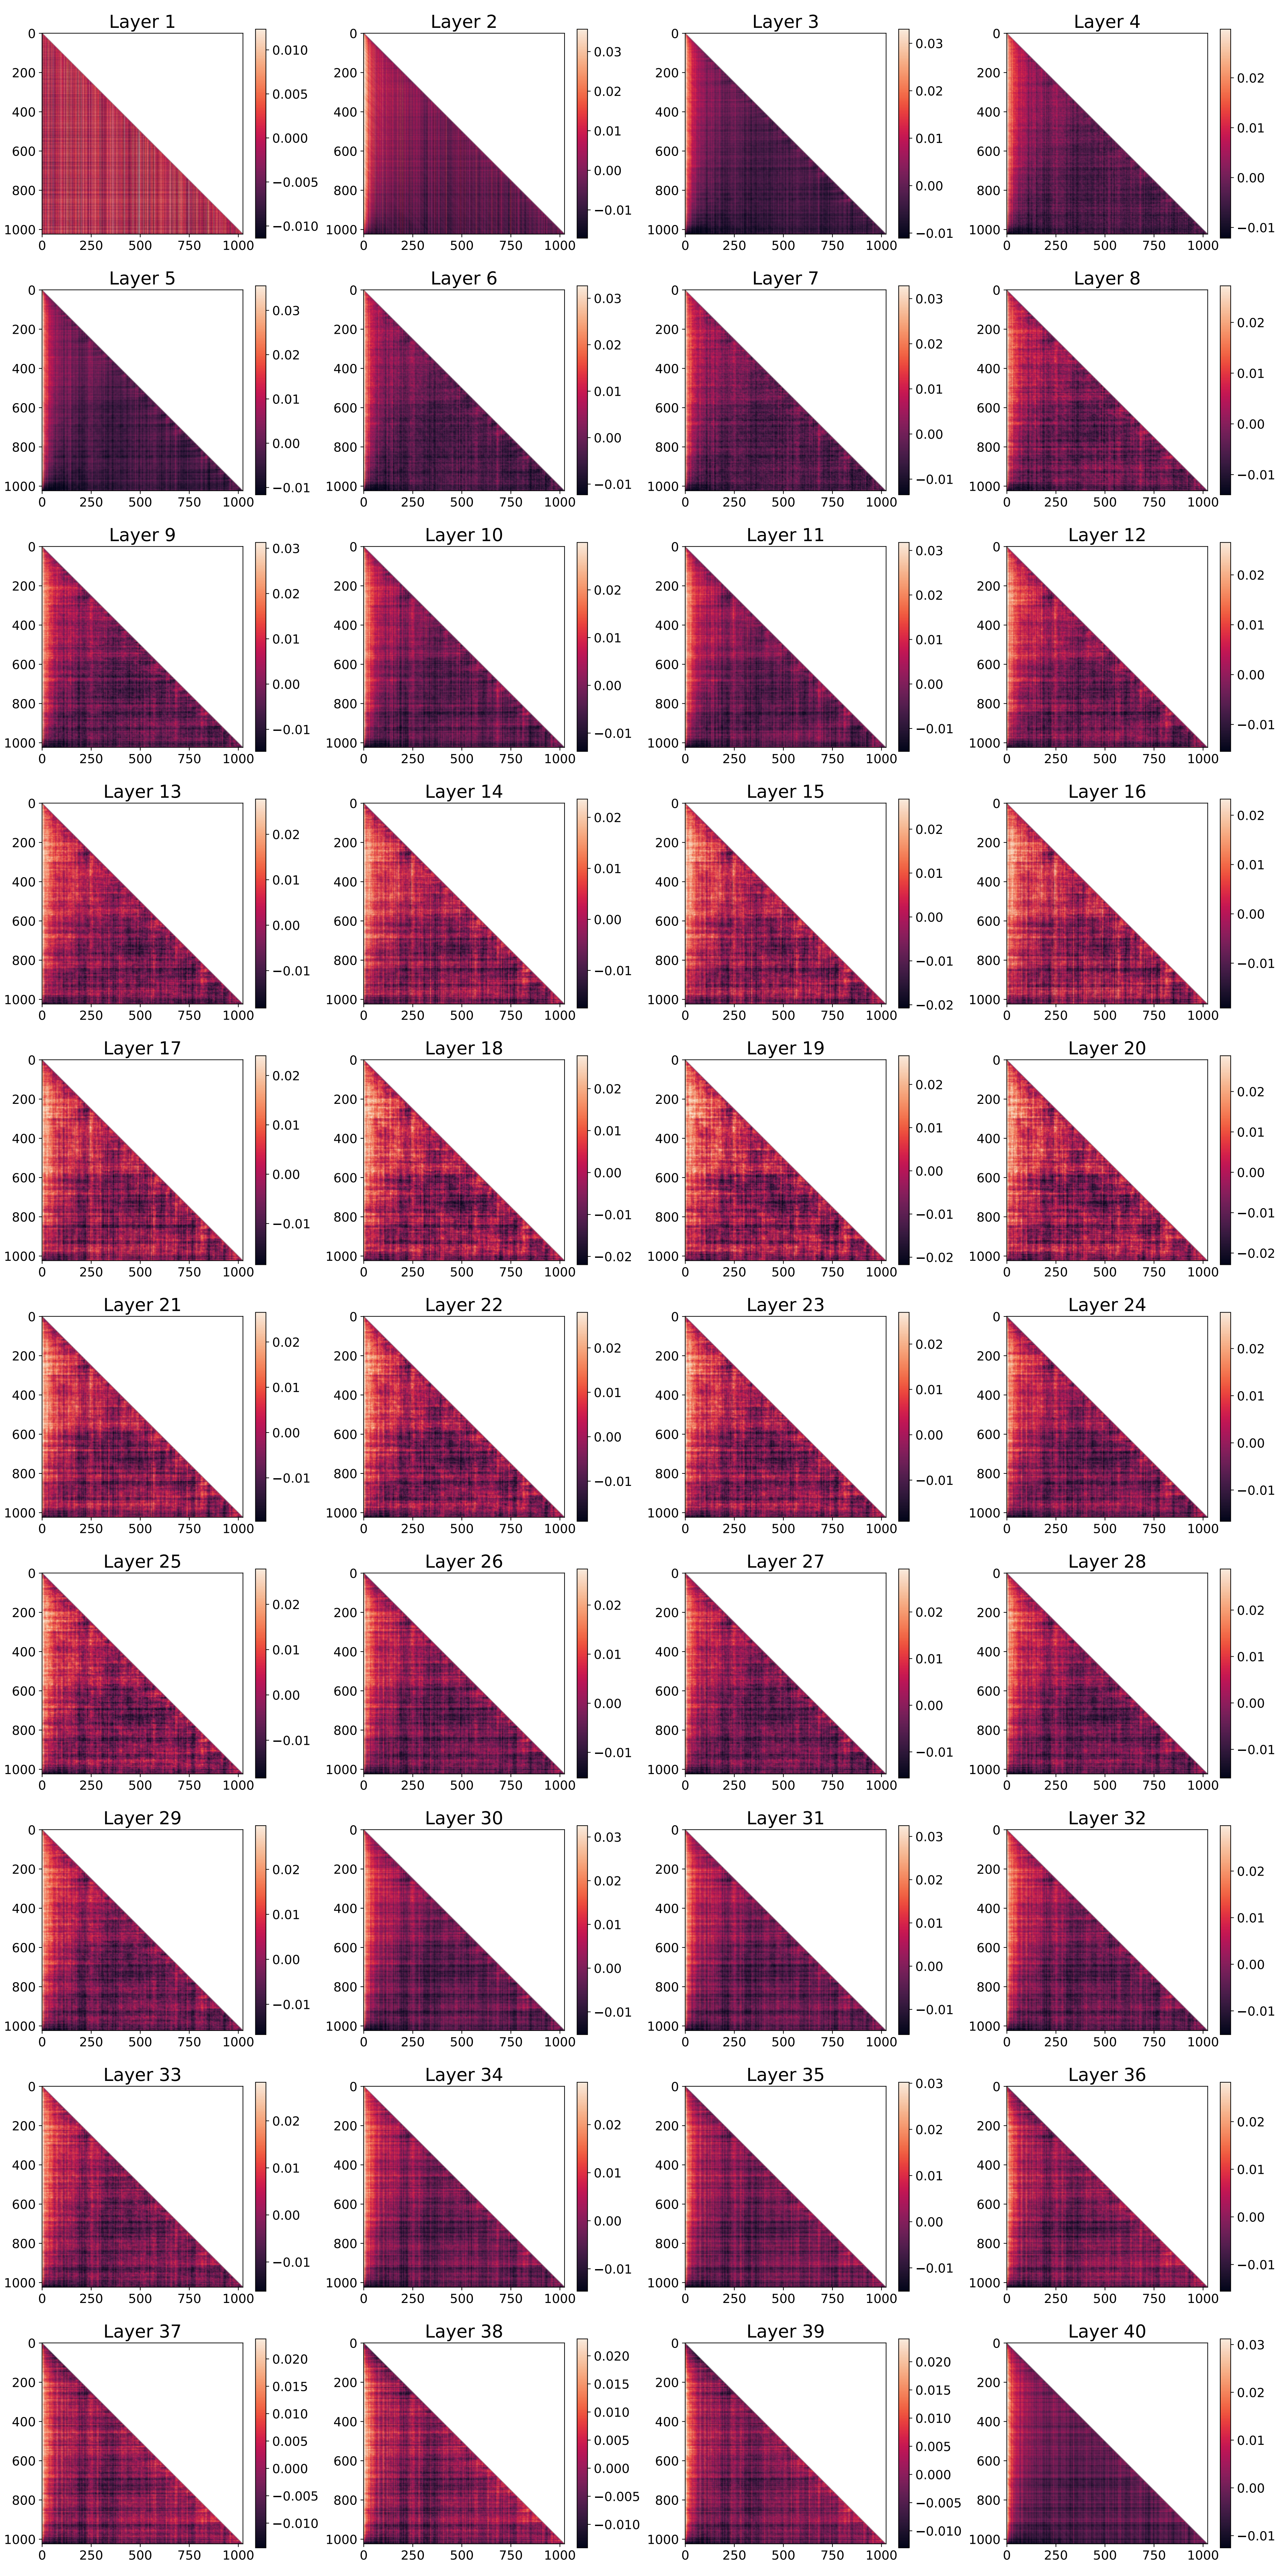

Supplement: supplementary_material [file phi4_rope_norm.pdf › figures/phi4_rope_norm.pdf]

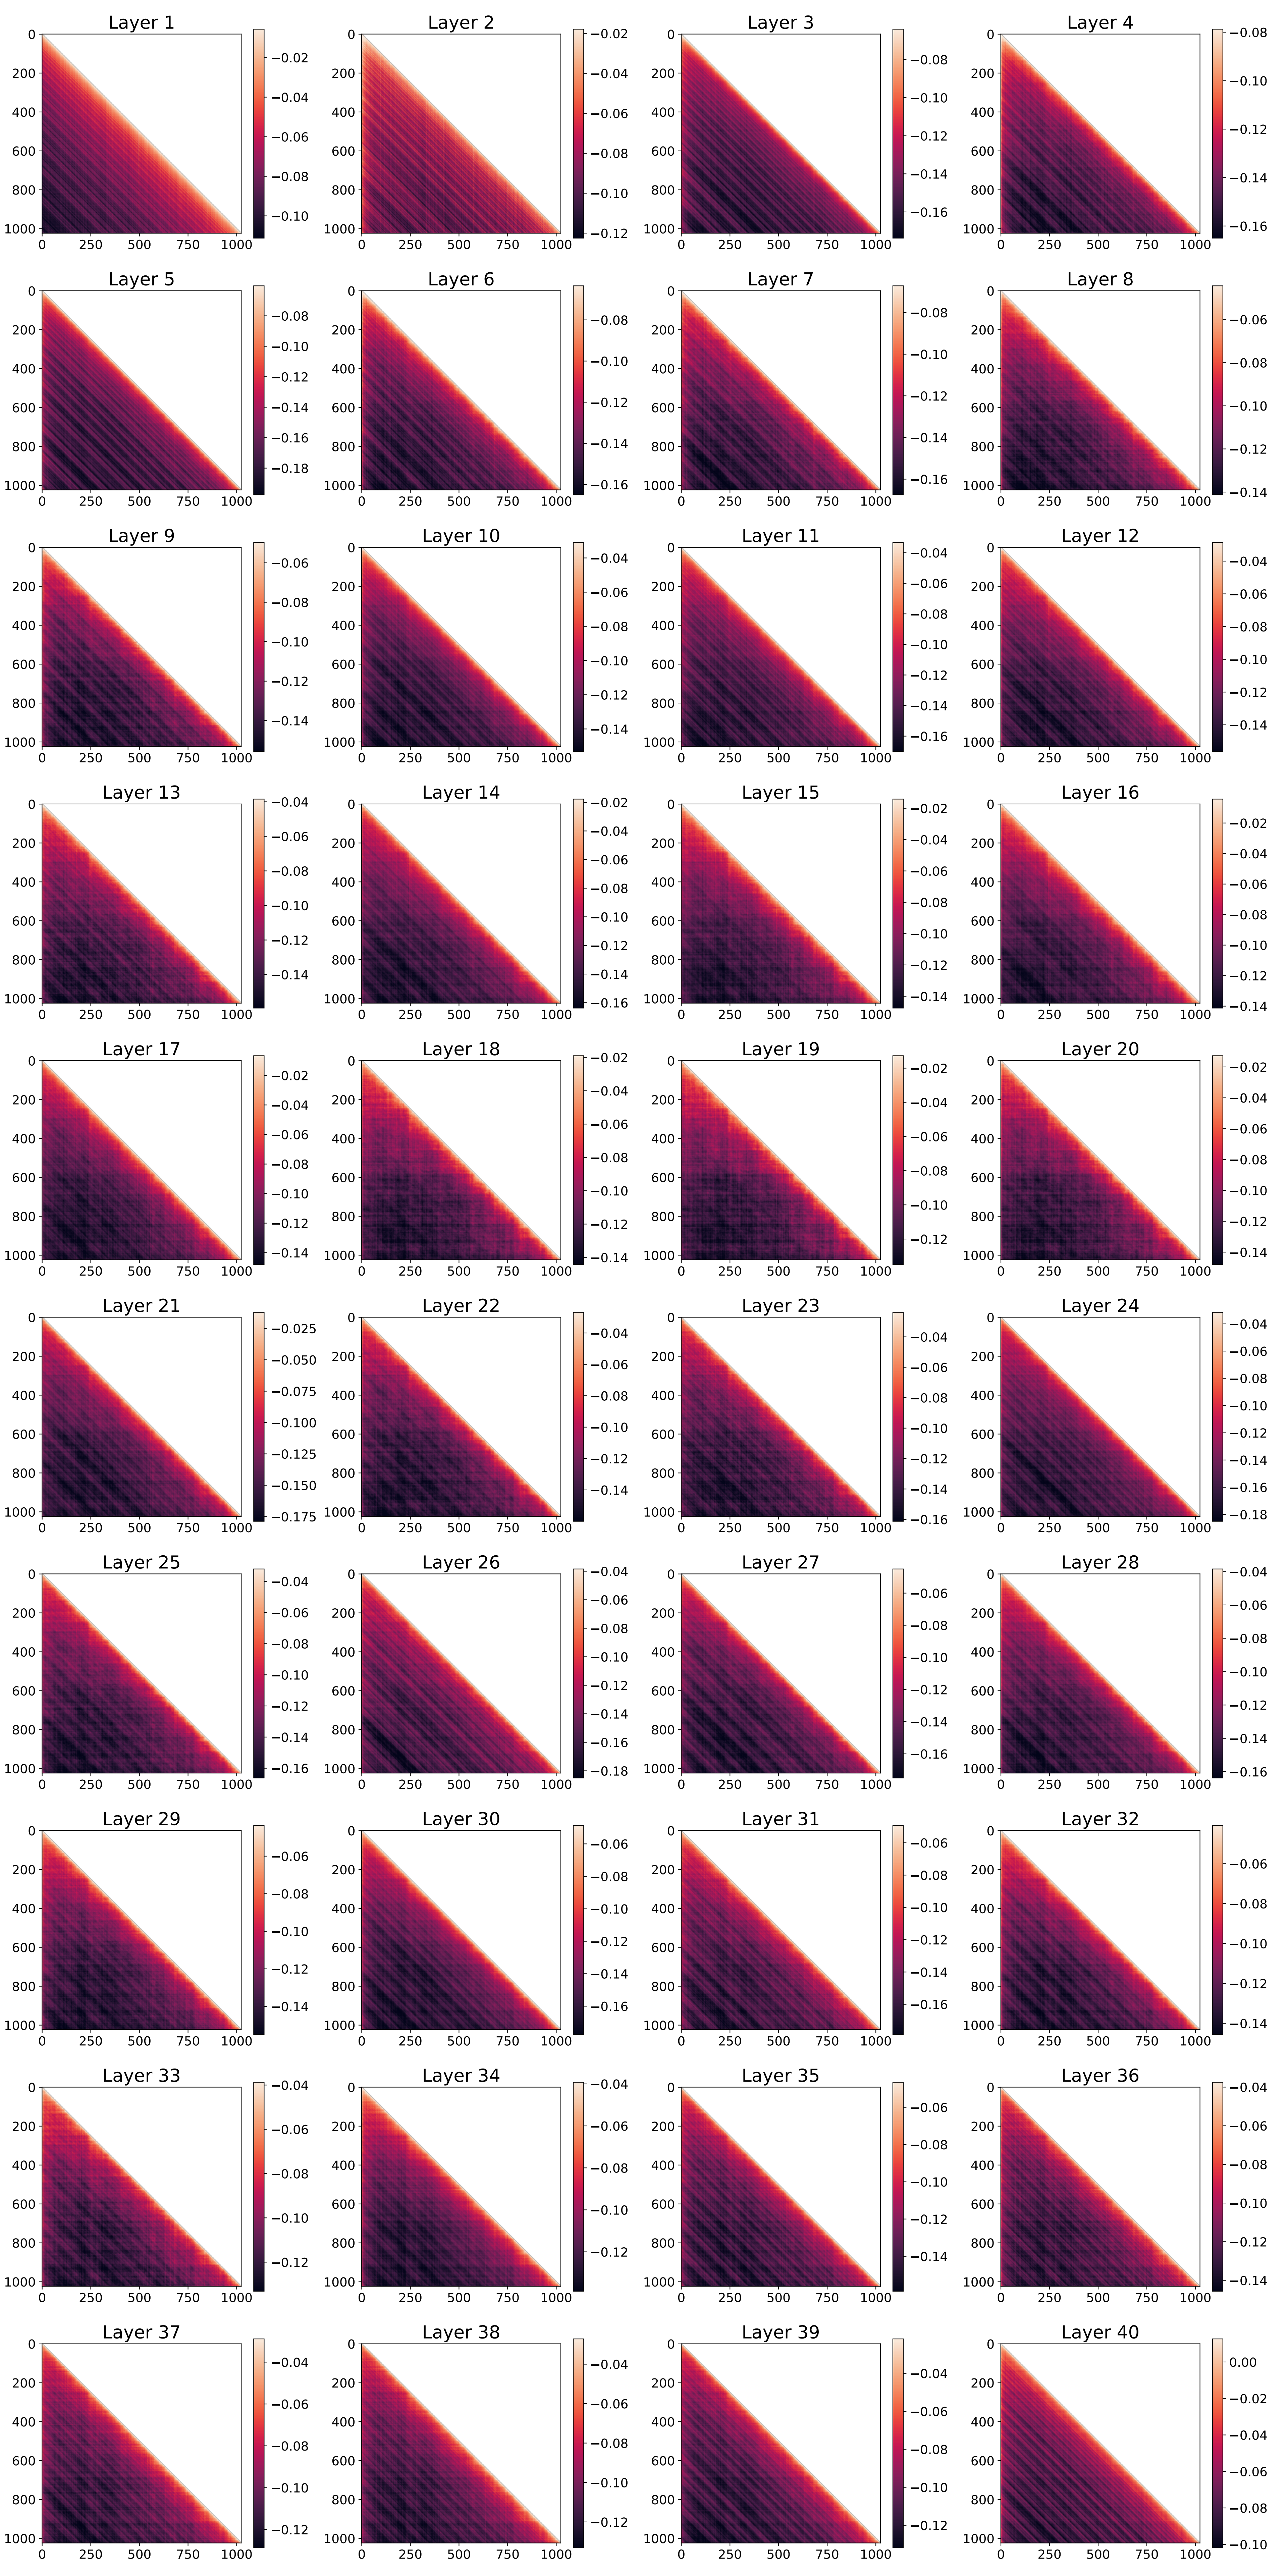

Supplement: supplementary_material [file phi4_rope_orig.pdf › figures/phi4_rope_orig.pdf]

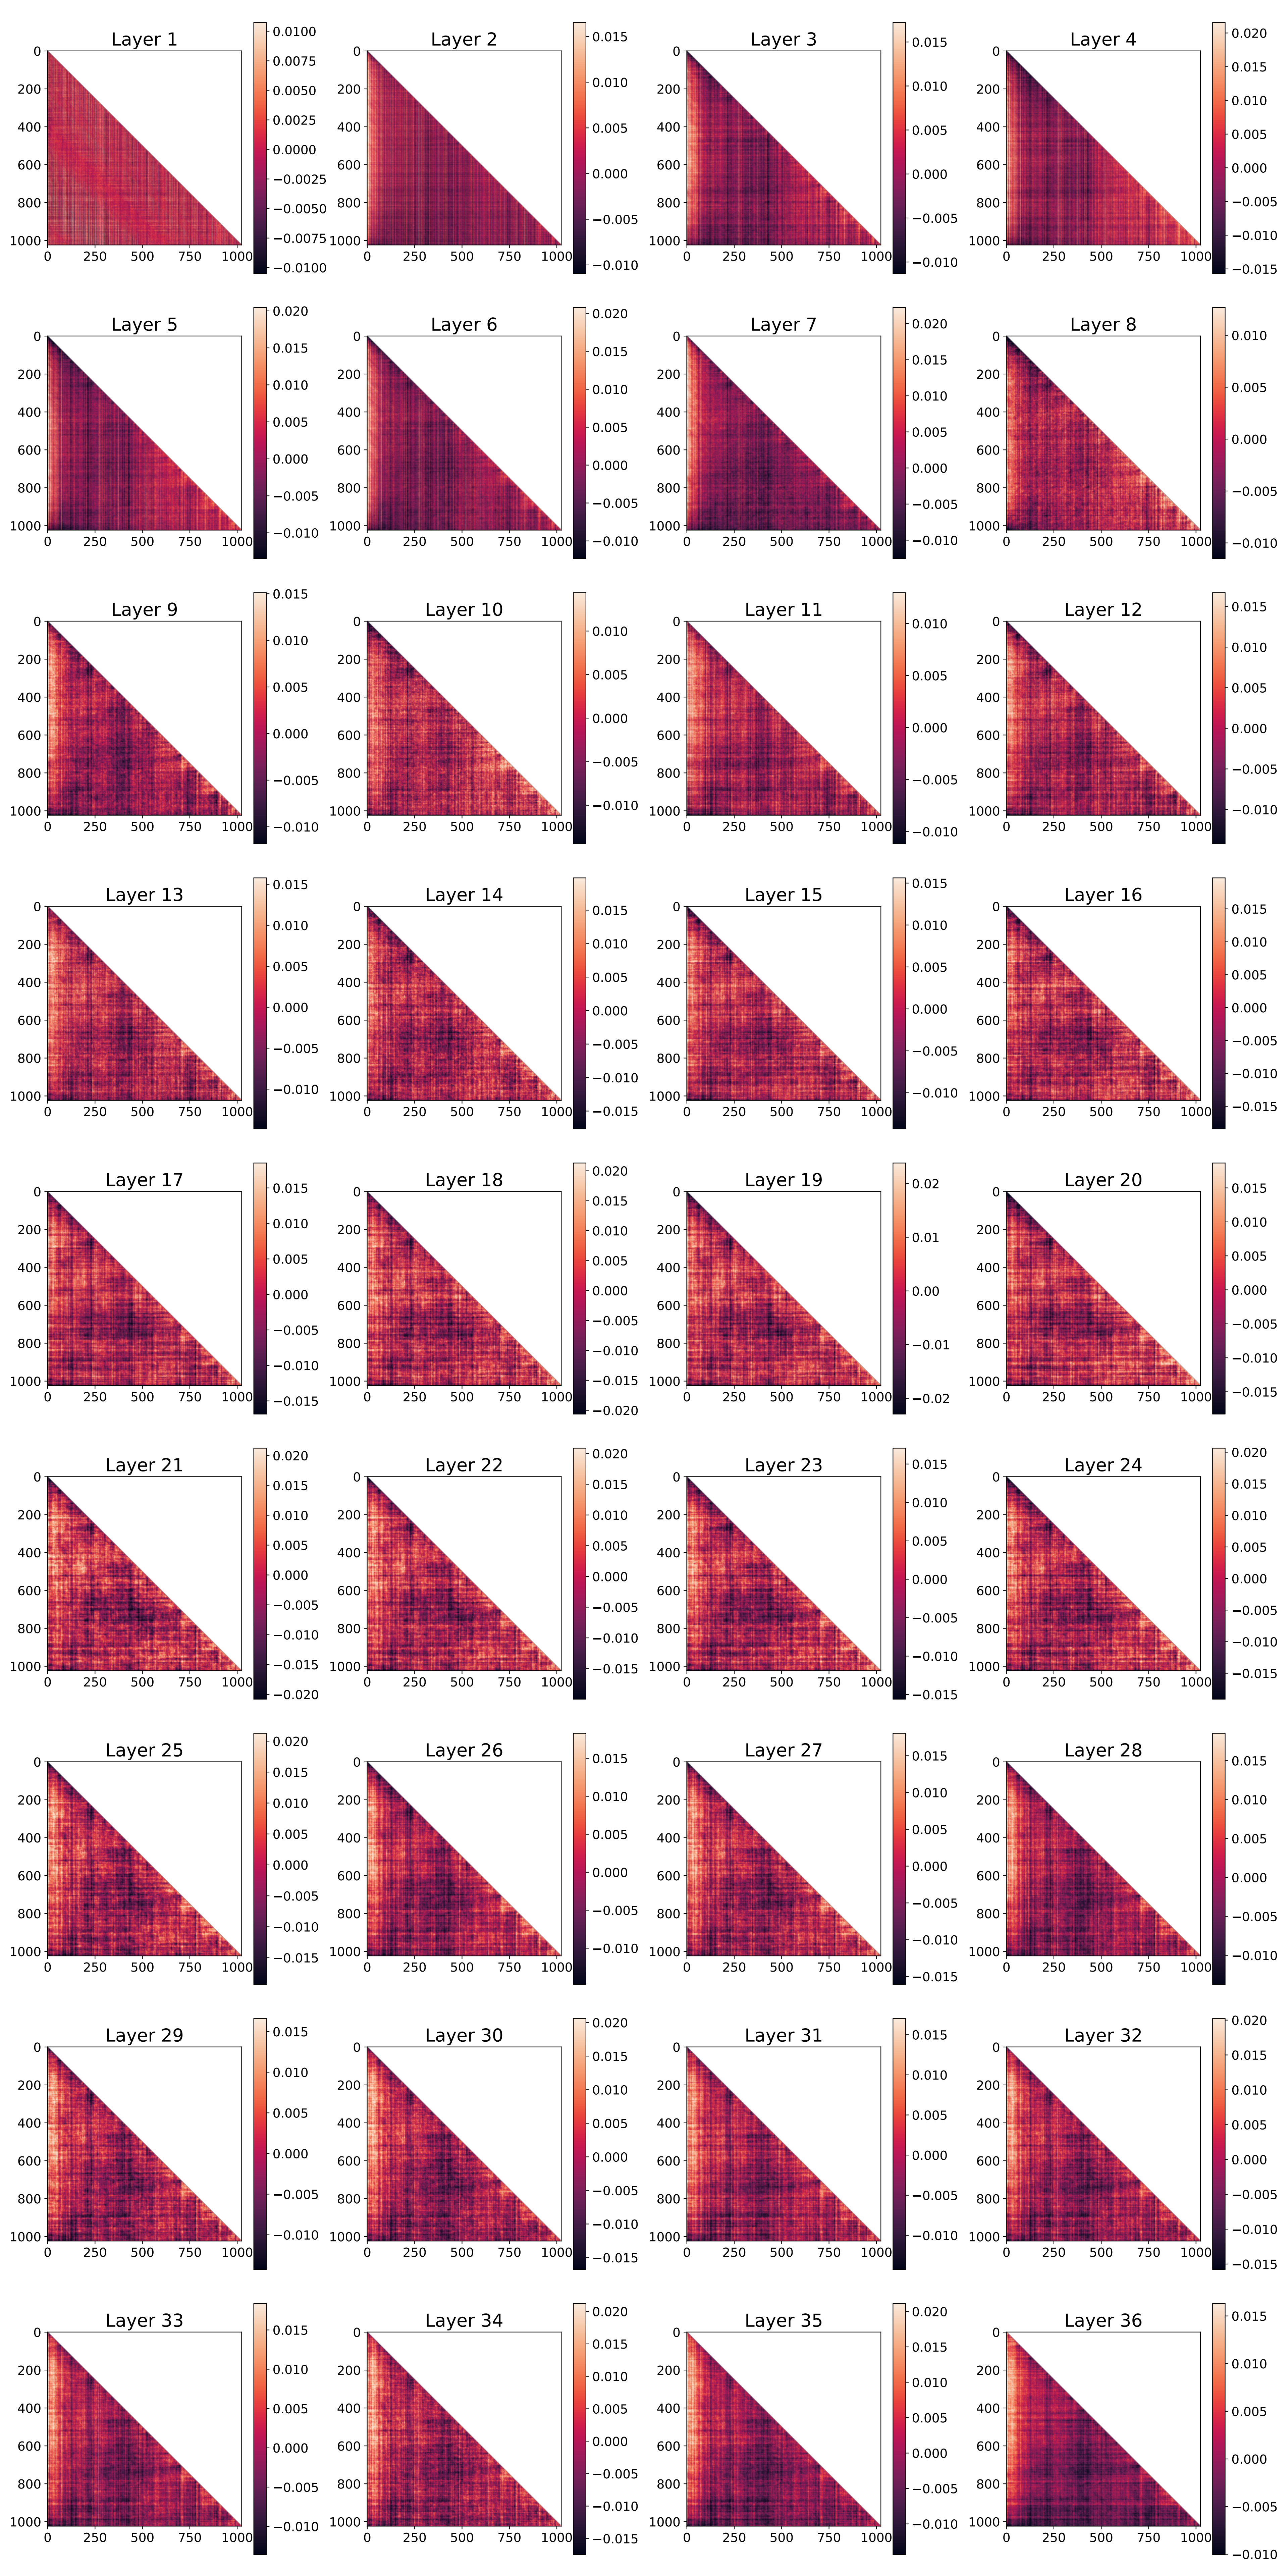

Supplement: supplementary_material [file qwen3_rope_norm.pdf › figures/qwen3_rope_norm.pdf]

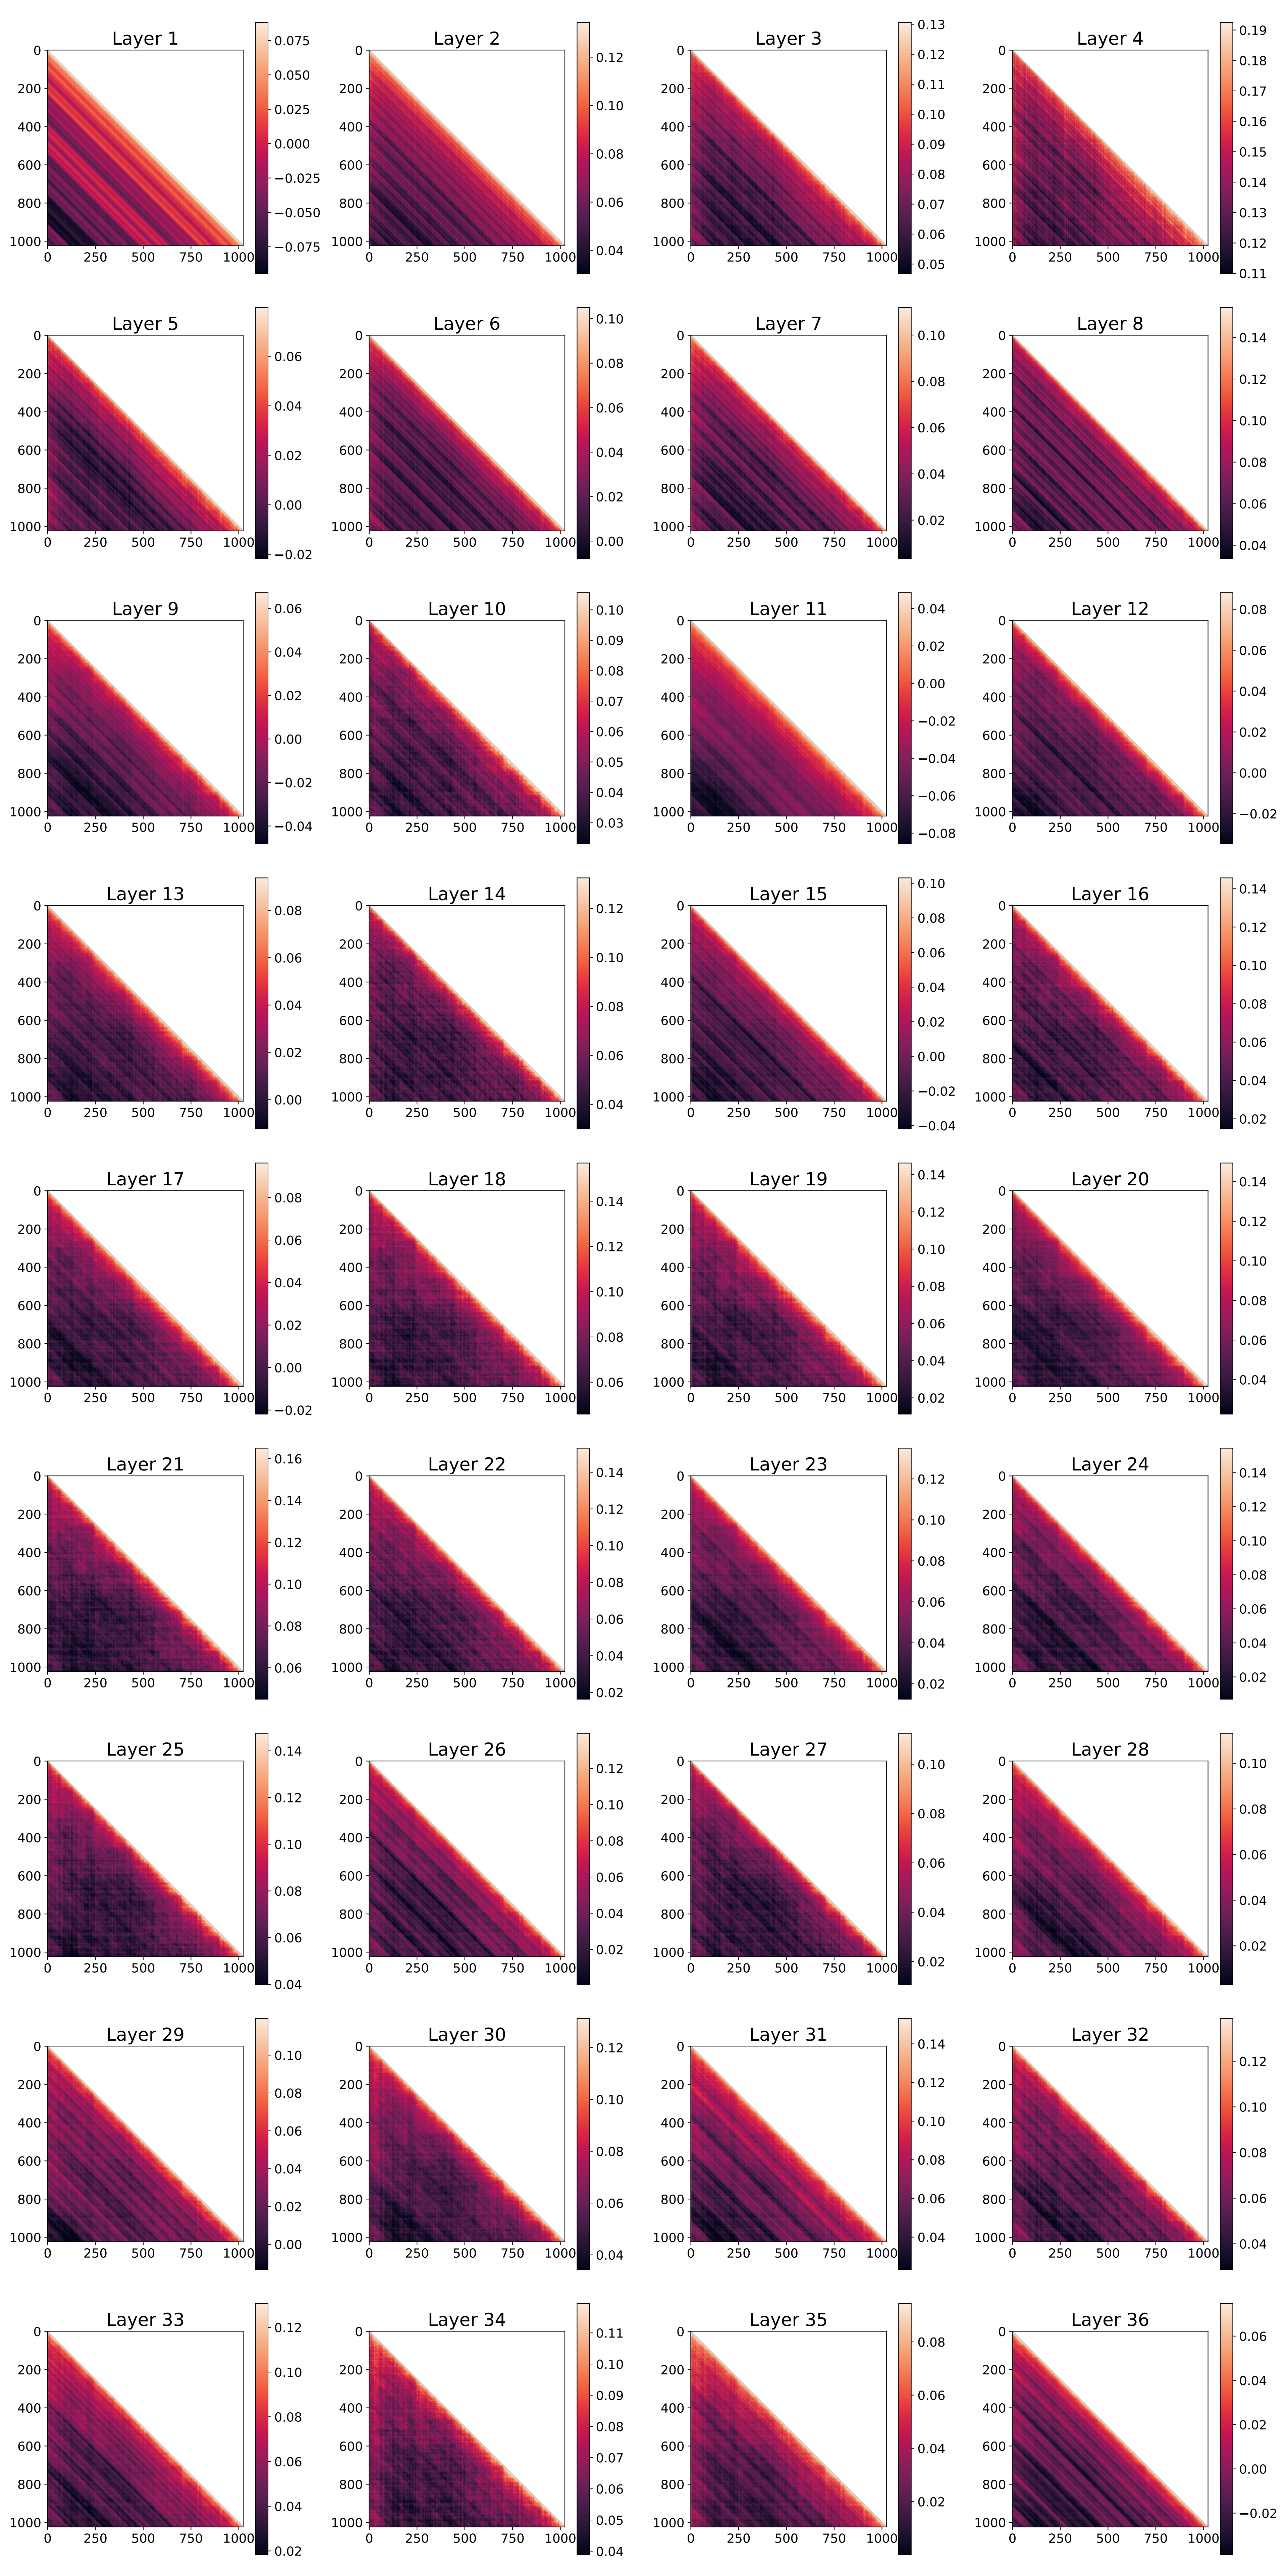

Supplement: supplementary_material [file qwen3_rope_orig.pdf › figures/qwen3_rope_orig.pdf]

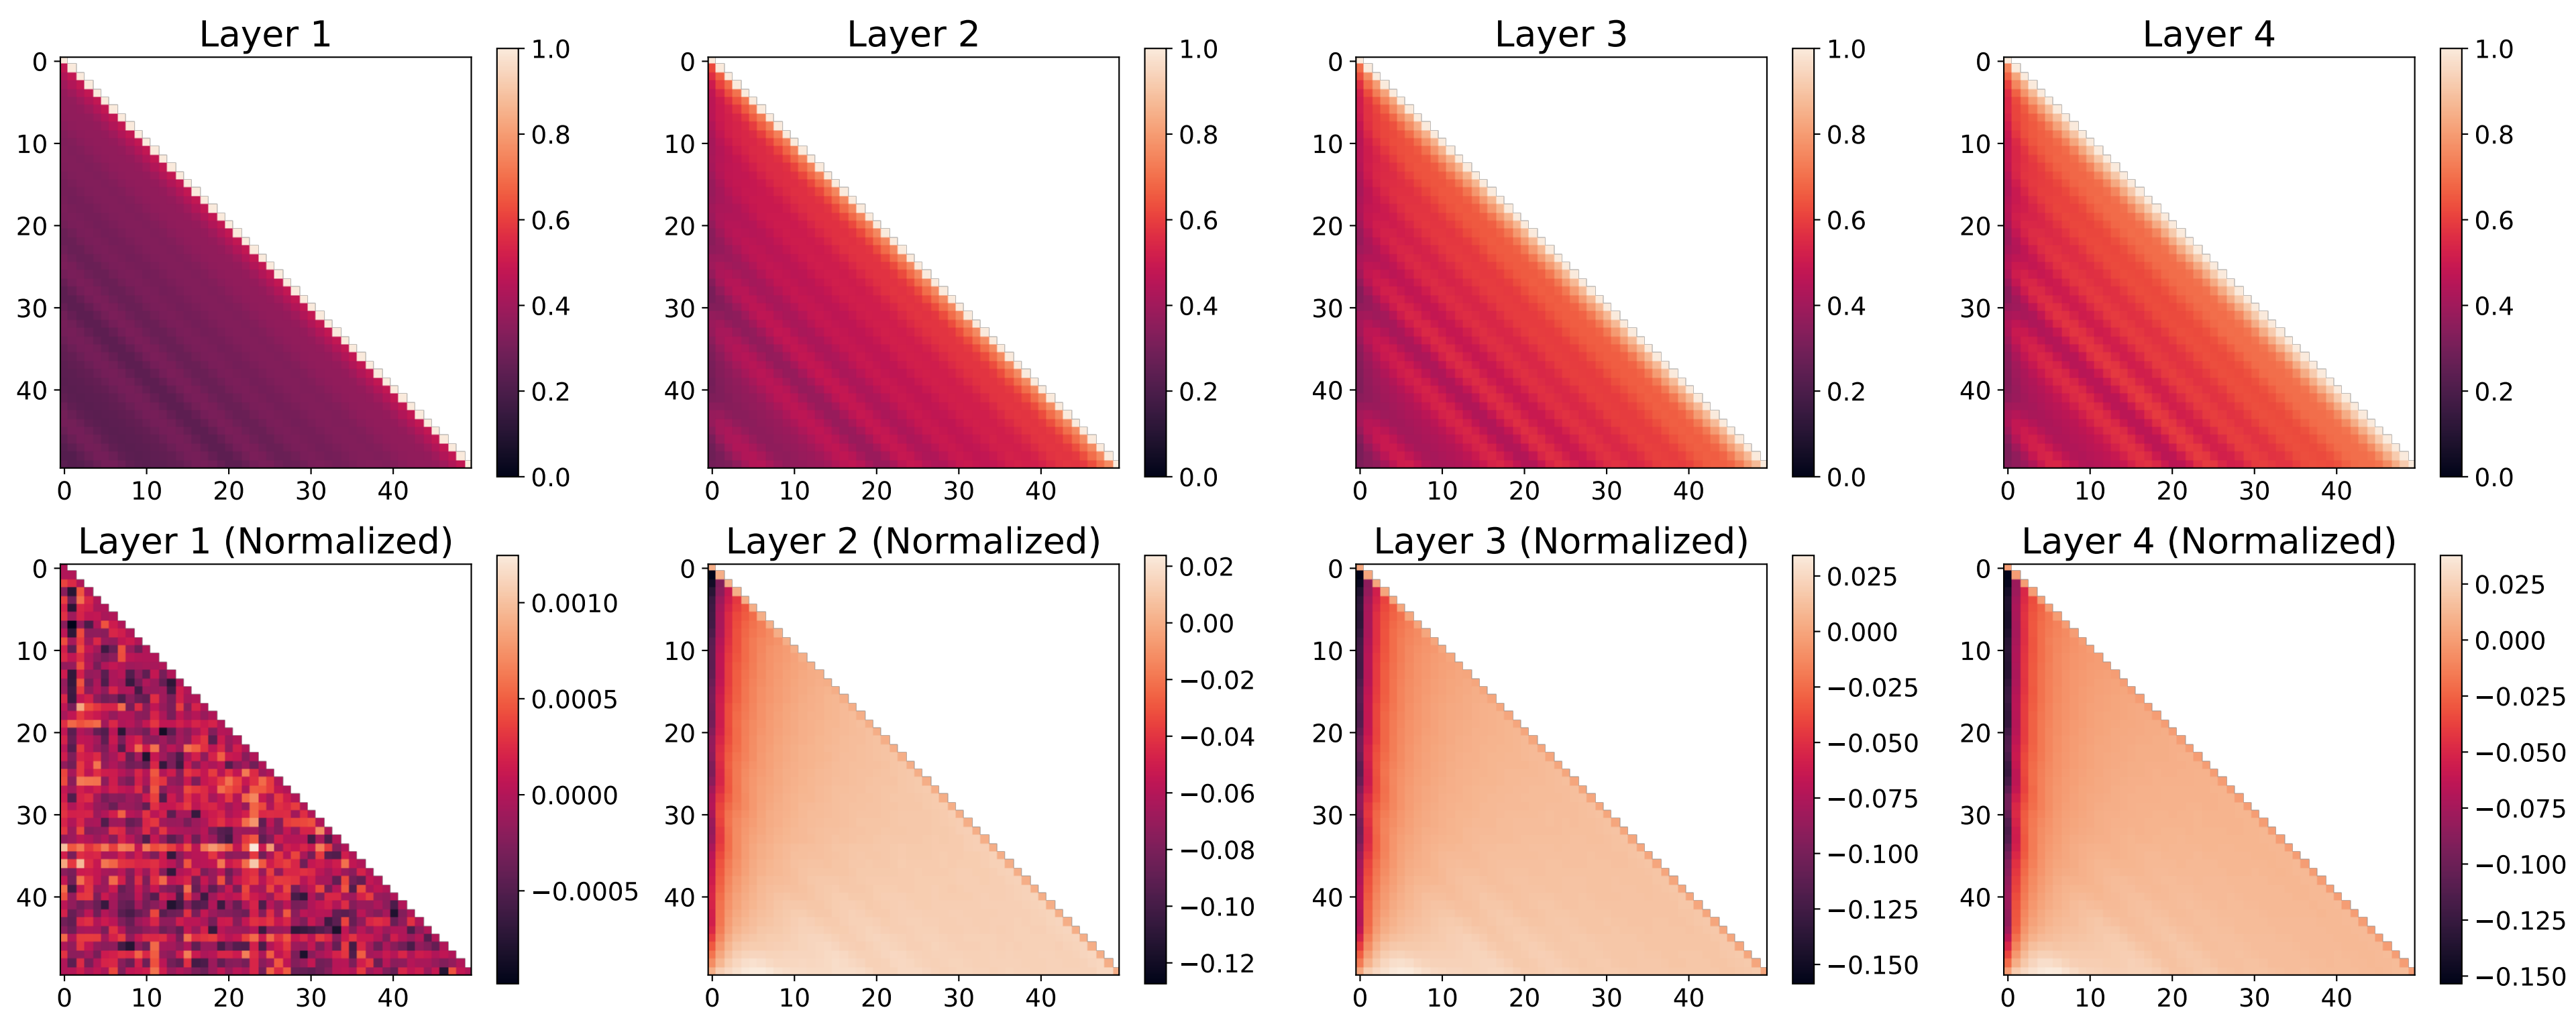

Supplement: supplementary_material [file rope_causal_05.pdf › figures/rope_causal_05.pdf]

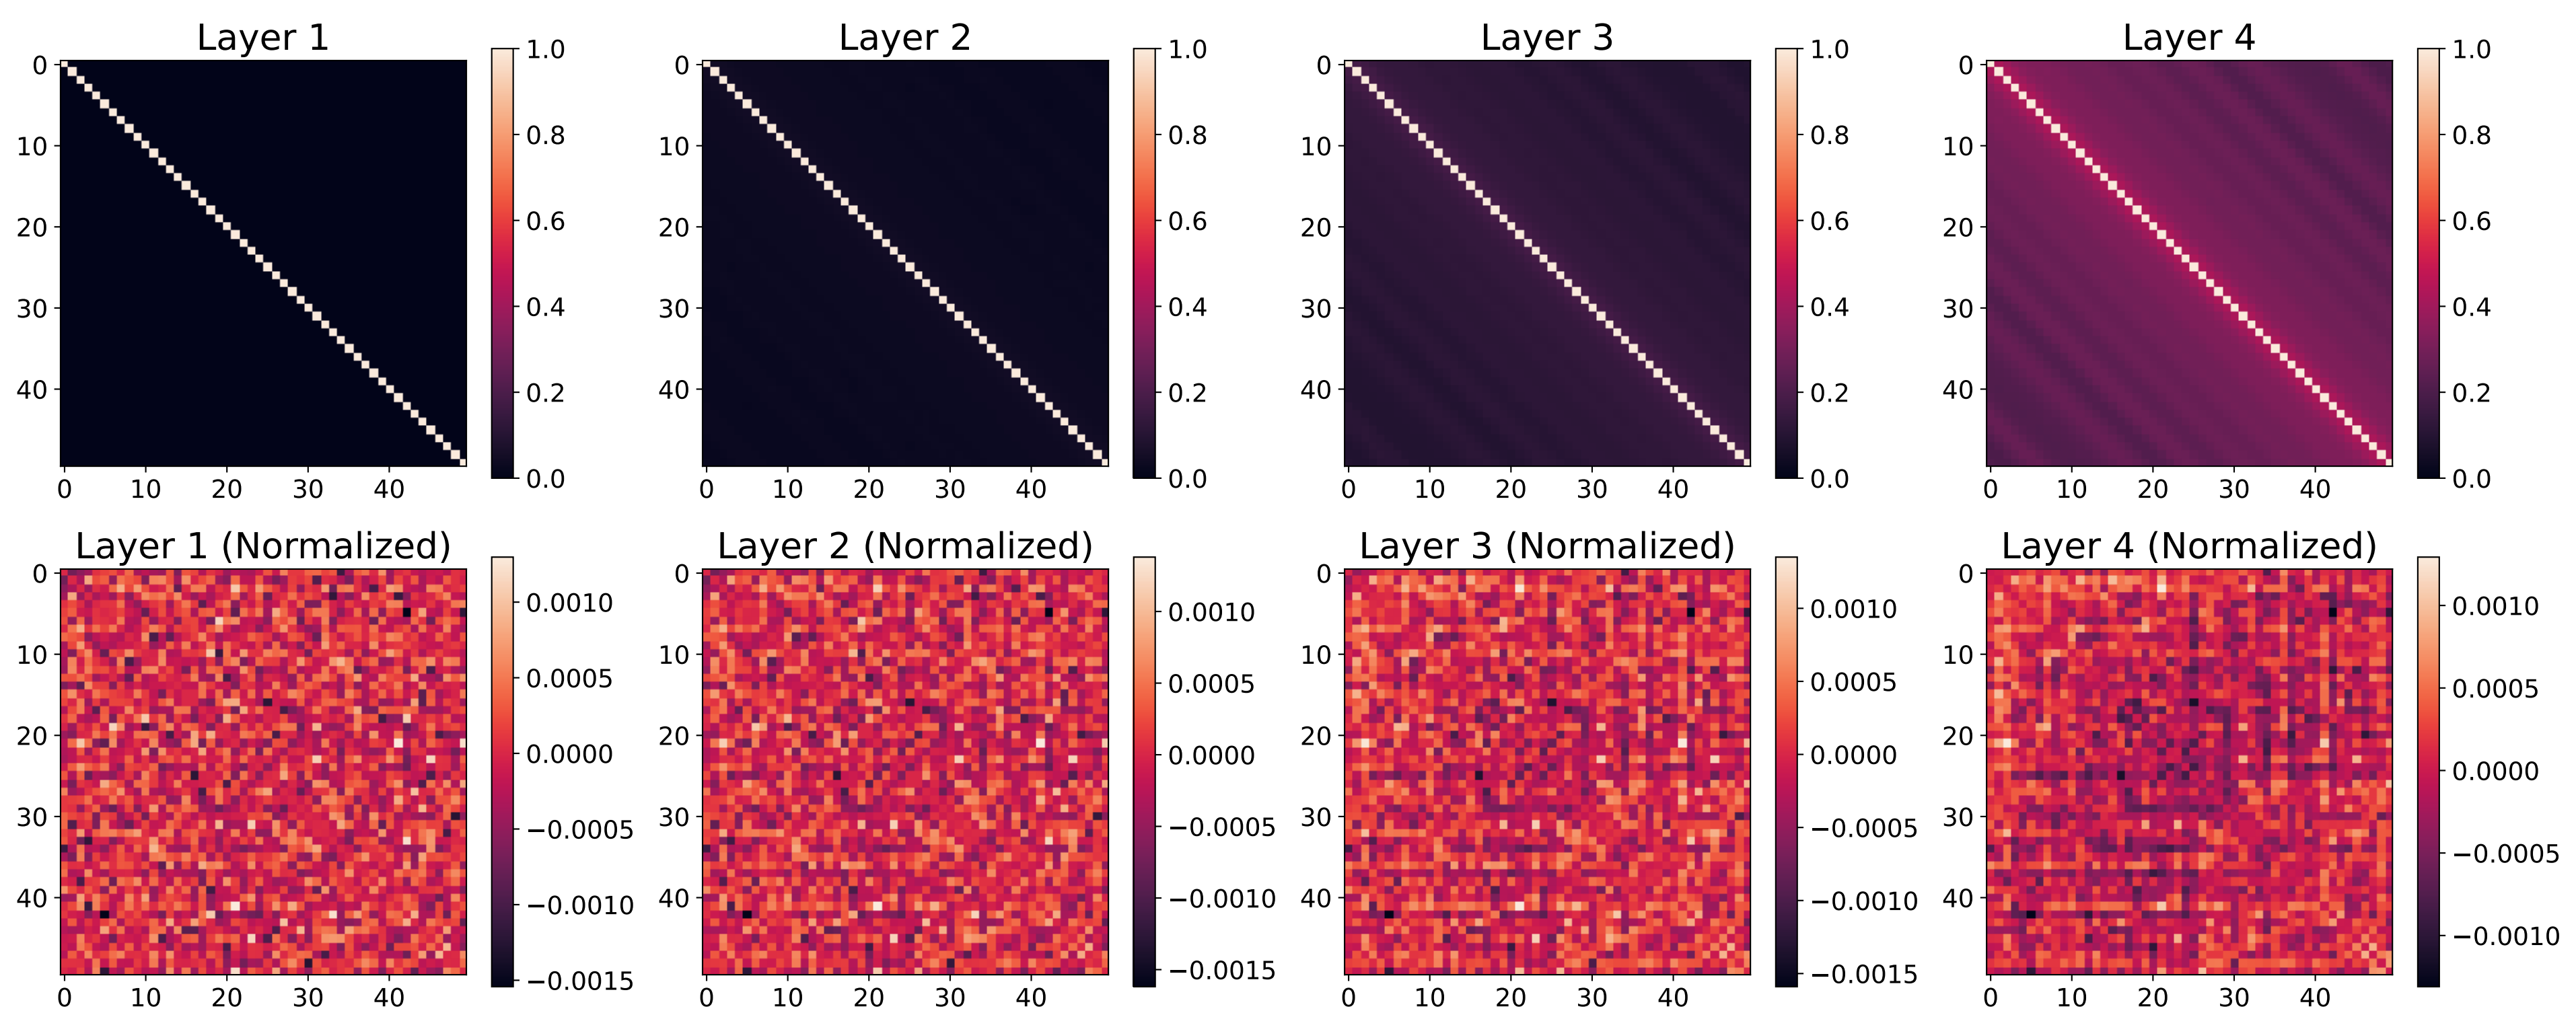

Supplement: supplementary_material [file rope_noncausal_0.pdf › figures/rope_noncausal_0.pdf]
